# Supplementary material
Source: publisher figshare collection journal article supplement (https://gsapubs.figshare.com/ndownloader/files/23297861)
Supplement: Supplementary file 1 [file 23297861]

# Holocene Indian Ocean tsunami history in Sri Lanka

**Kelly L. Jackson<sup>1</sup>, Gregor P. Eberli<sup>1</sup>, Falk Amelung<sup>1</sup>, Melany A. McFadden<sup>2</sup>,  
Andrew L. Moore<sup>3</sup>, Eugene C. Rankey<sup>4</sup>, and H. A. H. Jayasena<sup>5</sup>**

<sup>1</sup>*Department of Marine Geosciences, Rosenstiel School of Marine and Atmospheric Science, University of Miami,  
4600 Rickenbacker Causeway, Miami, FL 33149, USA*

<sup>2</sup>*Physical Science Department, Massasoit Community College, 1 Massasoit Blvd., Brockton, MA 02302, USA*

<sup>3</sup>*Department of Geosciences, Earlham College, 801 National Rd. West, Richmond, IN 47374, USA*

<sup>4</sup>*Department of Geology, University of Kansas, 120 Lindley Hall, Lawrence, KS 66045, USA*

<sup>5</sup>*Department of Geology, University of Peradeniya, Peradeniya 20400, Sri Lanka*

*Corresponding Author's Email: [kjackson@rsmas.miami.edu](mailto:kjackson@rsmas.miami.edu)*

## SUPPLEMENTARY INFORMATION

This online supplement contains additional figures and tables referenced in the original text that provide important datasets and clarification to the Holocene Indian Ocean tsunami history recorded in Sri Lanka. Contents include: Figures DR1-DR15 and Tables DR1-DR5.

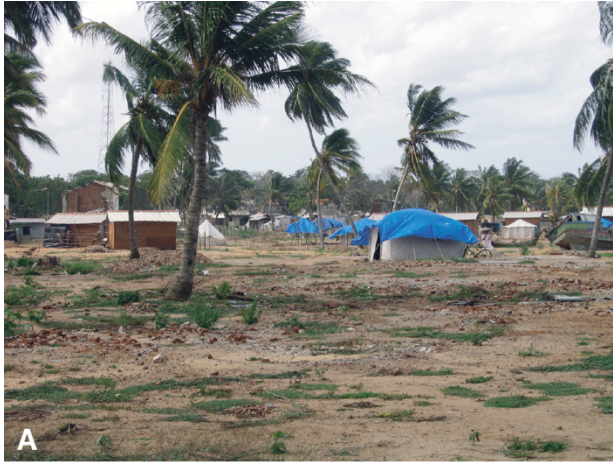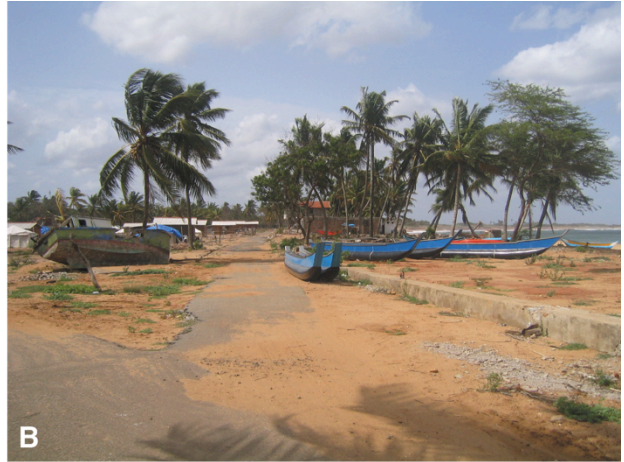

**Figure DR1.** The 26 December 2004 tsunami completely inundated the town of Hambantota and Karagan Lagoon. Images A. and B. show sand deposited by the tsunami over the town of Hambantota. Photos taken in August 2005.

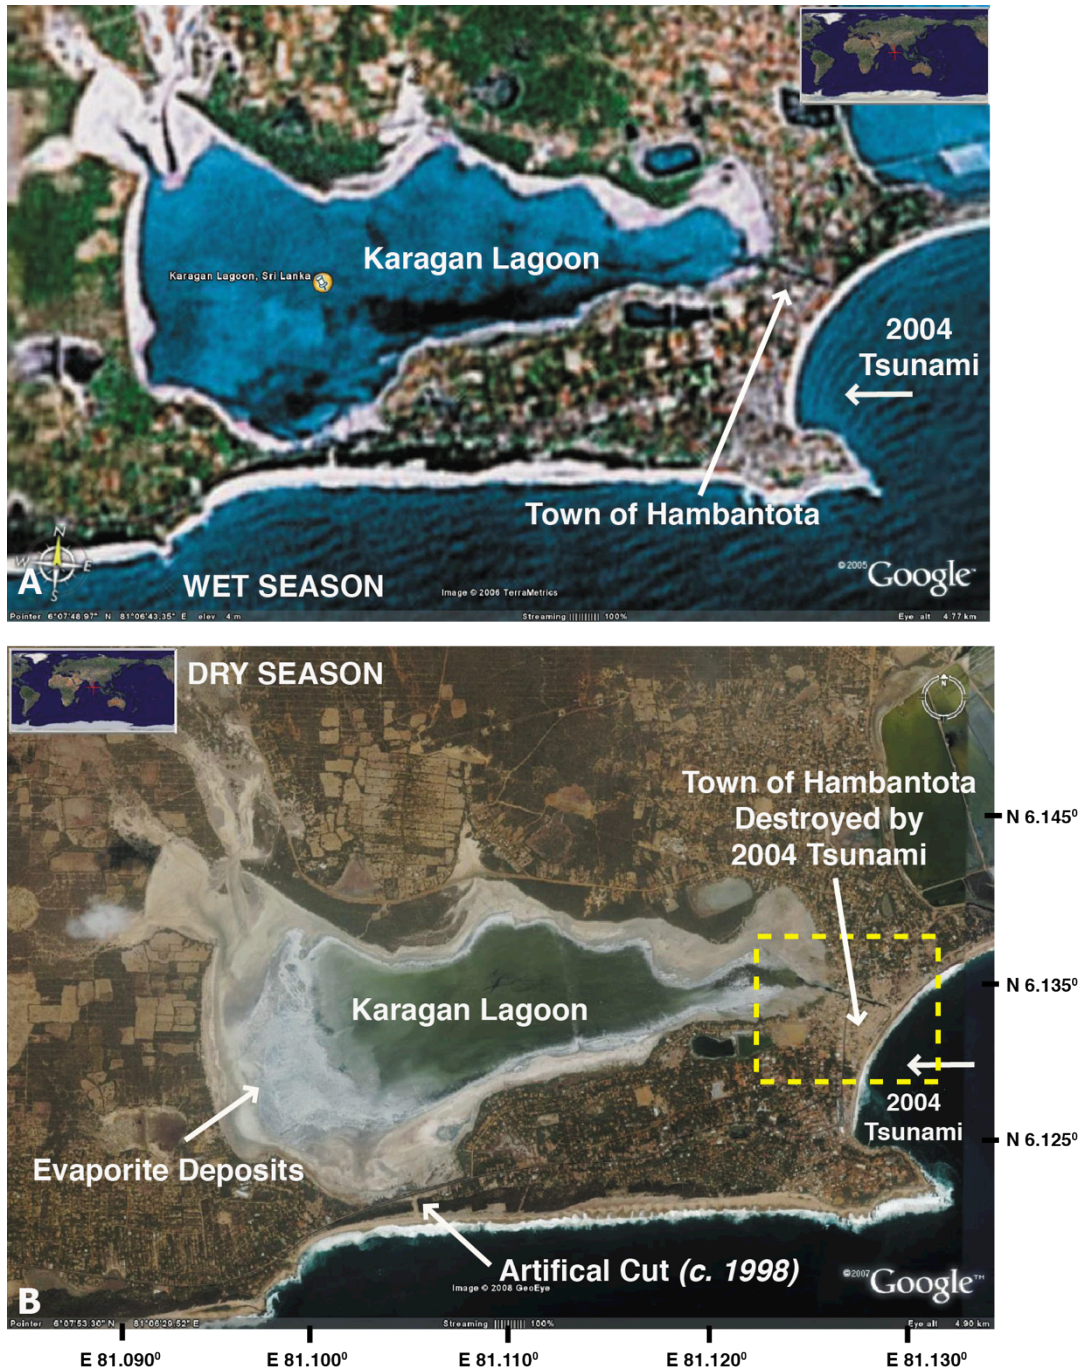

**Figure DR2.** Satellite images of Karagan Lagoon before and after the 2004 tsunami. A: Satellite image captured during the wet season, indicated by higher water levels in the lagoon, before the 2004 tsunami (acquisition date unknown). B: IKONOS image acquired 6 October 2005, ten months after the 26 December 2004 tsunami. Hambantota was destroyed and the tsunami deposited large quantities of sand across the land from beach and nearshore sediment sources. The yellow box indicates the view of Fig. DR3. The scale of each image is approximately 5 km across (Images courtesy of Google Earth, 2005, 2006).

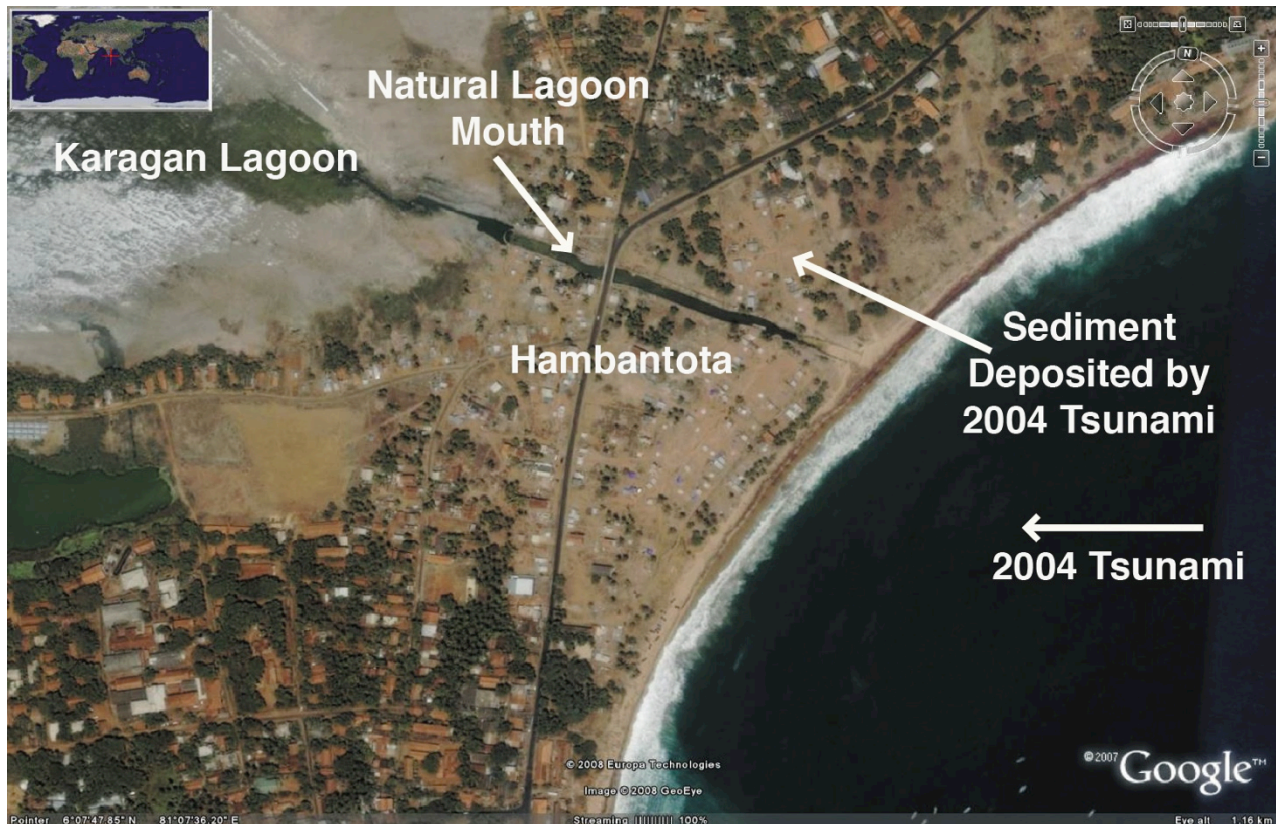

**Figure DR3.** Close-up view of the devastation of Hambantota visible on Google Earth acquired 7 October 2005 (area is the inset from Fig. DR2B) (Images courtesy of Google Earth, 2005, 2006).

## MATERIALS AND METHODS

### Sediment Coring

In August 2005, eight months following the 26 December 2004 tsunami, F. Amelung and K.L. Jackson traveled to Sri Lanka to survey the southeastern coastline, from Tangalle to Arugam Bay. The survey identified coastal lagoons inundated by the 2004 tsunami that had the highest preservation potential for paleotsunami deposits. Working with H.A.H. Jayasena and Soil Tech, Ltd., five sediment cores were collected from four different lagoons (Karagan, Lunama, Rekawa, and Arugam Bay Lagoons)

(Fig. DR4). Core D2 from Karagan Lagoon discussed in this paper contained the most well preserved sand units compared to any other lagoon sediments that were sampled.

In a second field season in October 2006, H.A.H. Jayasena together with Soil Tech, Ltd., retrieved additional cores from Karagan Lagoon. The cores range in total length from less than 1.0 to 4.0 m and were collected using a weighted tripod system (Fig. DR4). Custom steel casings and standard 6 cm diameter PVC pipes were both used for the coring casing.

A total of 22 sediment cores were collected from Karagan Lagoon in 2005 and 2006 (Table DR1) along transects parallel and perpendicular to the shoreline. All cores and field data were collected prior to the construction of the Port of Hambantota. Sediment cores were shipped to the University of Miami-RSMAS for analyses. Grain-size was measured by A. L. Moore using a Malvern Mastersizer 2000 laser diffractometer. Core descriptions, sedimentology, and chronology are further discussed in the M.S. thesis of Jackson (2008).

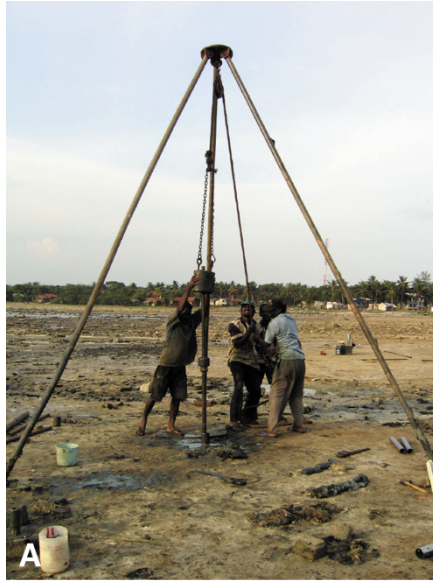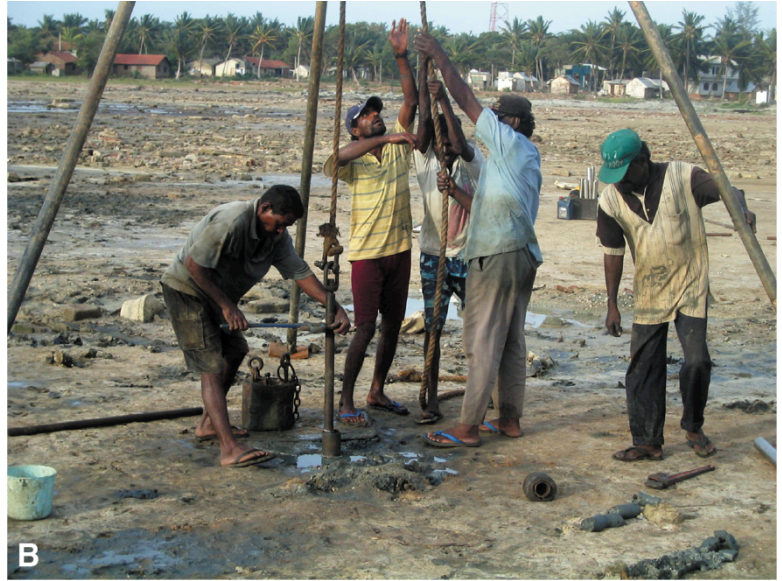

**Figure DR4.** Field photographs of Soil Tech, Ltd. coring in August 2005. The cores were collected using a weighted tripod system with a mixture of steel and PVC casings.

TABLE DR1. SEDIMENT CORE NAMES, LENGTHS, AND LOCATIONS FROM KARAGAN LAGOON, SRI LANKA

| Location                  | Year core collected | Core name | Corresponding core and section names Jackson (2008) | Cored length (m) | Recovered length (cm) | Latitude (north) <sup>o†</sup> | Longitude (east) <sup>o†</sup> |
|---------------------------|---------------------|-----------|-----------------------------------------------------|------------------|-----------------------|--------------------------------|--------------------------------|
| Karagan Lagoon, Sri Lanka | 2005                | D2        | SLHAM05                                             | H1               | 0.0-1.0               | 6.131                          | 81.123                         |
|                           |                     |           |                                                     | H2               | 1.0-2.0               |                                |                                |
|                           |                     |           |                                                     | H3               | 2.0-2.5               |                                |                                |
|                           |                     |           |                                                     | H4               | 2.5-3.0               |                                |                                |
|                           |                     |           |                                                     | H5               | 3.0-3.5               |                                |                                |
|                           |                     |           |                                                     | H6               | 3.5-4.0               |                                |                                |
|                           |                     | S11       | SLHAM05_B/ HB1                                      | HAMB or HB1      | 0.0-1.0               | 6.133                          | 81.123                         |
|                           | 2006                | S12       | SLHAM06_00                                          | N/A              | 0.0-1.0               | 6.134                          | 81.124                         |
|                           |                     | S1        | SLHAM06_L0                                          | N/A              | 0.0-1.0               | 6.132                          | 81.124                         |
|                           |                     | S2        | SLHAM06_L1                                          | N/A              | 0.0-1.0               | 6.131                          | 81.122                         |
|                           |                     | S3        | SLHAM06_L2                                          | N/A              | 0.0-1.0               | 6.130                          | 81.121                         |
|                           |                     | S4        | SLHAM06_L3                                          | N/A              | 0.0-1.0               | 6.130                          | 81.118                         |
|                           |                     | S5        | SLHAM06_L4                                          | N/A              | 0.0-1.0               | 6.129                          | 81.117                         |
|                           |                     | S10       | SLHAM06_R1                                          | N/A              | 0.0-1.0               | 6.134                          | 81.123                         |
|                           |                     | S9        | SLHAM06_R2                                          | N/A              | 0.0-1.0               | 6.134                          | 81.122                         |
|                           |                     | S8        | SLHAM06_R3                                          | N/A              | 0.0-1.0               | 6.134                          | 81.121                         |
|                           |                     | S7        | SLHAM06_R4                                          | N/A              | 0.0-1.0               | 6.133                          | 81.119                         |
|                           |                     | S6        | SLHAM06_R5                                          | N/A              | 0.0-1.0               | 6.132                          | 81.118                         |
|                           |                     | D1        | SLHAM06_DC1                                         | DC1(1)           | 0.0-1.0               | 6.132                          | 81.124                         |
|                           |                     |           |                                                     | DC1(2)           | 1.0-2.0               |                                |                                |
|                           |                     |           |                                                     | DC1(3)           | 2.0-3.0               |                                |                                |
|                           |                     |           |                                                     | DC1(4)           | 3.0-4.0               |                                |                                |
|                           |                     | D3        | SLHAM06_DC2                                         | DC2(1)           | 0.0-1.0               | 6.132                          | 81.121                         |
|                           |                     |           |                                                     | DC2(2)           | 1.0-2.0               |                                |                                |
|                           |                     |           |                                                     | DC2(3)           | 2.0-3.0               |                                |                                |
|                           |                     |           |                                                     | DC2(4)           | 3.0-4.0               |                                |                                |
|                           |                     | D4        | SLHAM06_DC3                                         | DC3(1)           | 0.0-1.0               | 6.131                          | 81.117                         |
|                           |                     |           |                                                     | DC3(2)           | 1.0-2.0               |                                |                                |
|                           |                     |           |                                                     | DC3(3)           | 2.0-3.0               |                                |                                |
|                           |                     |           |                                                     | DC3(4)           | 3.0-4.0               |                                |                                |
|                           |                     | D7        | SLHAM06_DC4                                         | DC4(1)           | 0.0-1.0               | 6.121                          | 81.102                         |
|                           |                     |           |                                                     | DC4(2)           | 1.0-2.0               |                                |                                |
|                           |                     |           |                                                     | DC4(3)           | 2.0-3.0               |                                |                                |
|                           |                     |           |                                                     | DC4(4)           | 3.0-4.0               |                                |                                |
|                           |                     | D5        | SLHAM06_DC5                                         | DC5(1)           | 0.0-1.0               | 6.127                          | 81.108                         |
|                           |                     |           |                                                     | DC5(2)           | 1.0-2.0               |                                |                                |
|                           |                     | D6        | SLHAM06_DC6                                         | DC6(1)           | 0.0-1.0               | 6.125                          | 81.102                         |
|                           |                     |           |                                                     | DC6(2)           | 1.0-2.0               |                                |                                |
|                           |                     |           |                                                     | DC6(3)           | 2.0-3.0               |                                |                                |
|                           |                     |           |                                                     | DC6(4)           | 3.0-4.0               |                                |                                |
|                           |                     | D8        | SLHAM06_DC7                                         | DC7(1)           | 0.0-1.0               | 6.131                          | 81.097                         |
|                           |                     |           |                                                     | DC7(2)           | 1.0-2.0               |                                |                                |
|                           |                     |           |                                                     | DC7(3)           | 2.0-3.0               |                                |                                |
|                           |                     | D10       | SLHAM06_AL1                                         | AL1(1)           | 0.0-1.0               | 6.134                          | 81.099                         |
|                           |                     |           |                                                     | AL1(2)           | 1.0-2.0               |                                |                                |
|                           |                     | D9        | SLHAM06_AL2                                         | AL2(1)           | 0.0-1.0               | 6.134                          | 81.096                         |
|                           |                     |           |                                                     | AL2(2)           | 1.0-2.0               |                                |                                |
|                           |                     |           |                                                     | AL2(3)           | 2.0-3.0               |                                |                                |
|                           |                     |           |                                                     | AL2(4)           | 3.0-4.0               |                                |                                |

<sup>†</sup> All coordinates are reported in decimal degrees latitude (N), longitude (E), WGS84.

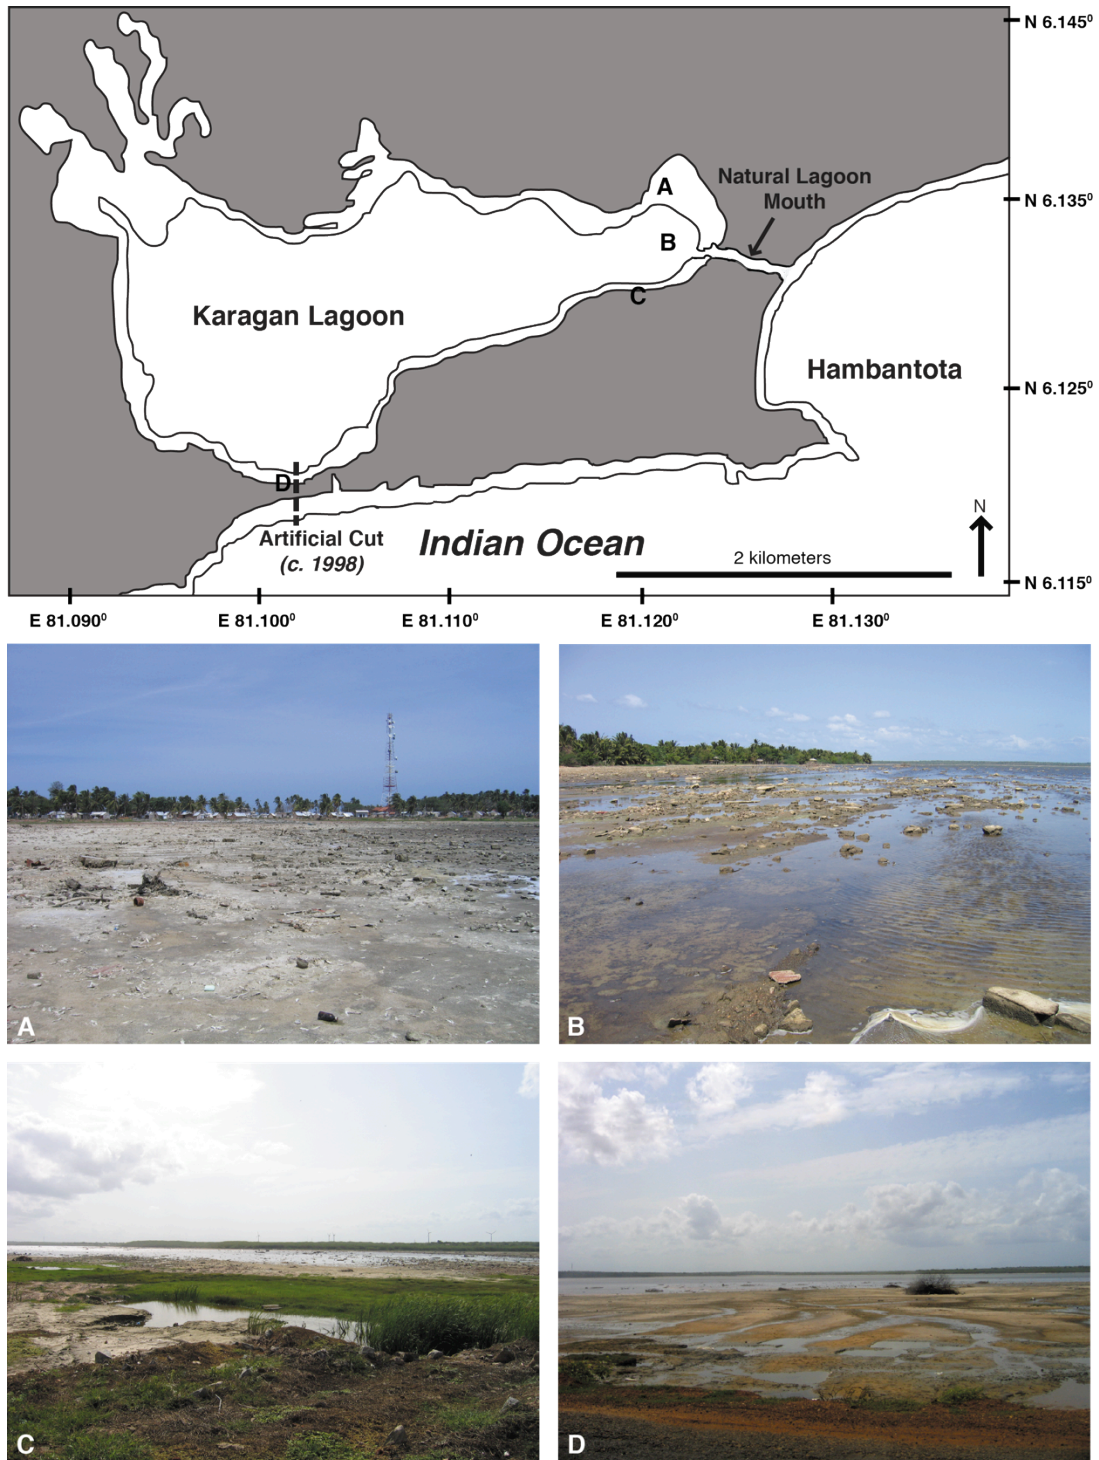

**Figure DR5.** Karagan Lagoon, Hambantota, Sri Lanka. A: View of Karagan Lagoon from northern rim near mouth looking south towards town. Note the dry surface and extent of debris left from the tsunami. B: View of lagoon looking west. Debris is from the 2004 tsunami. C: View of lagoon from southern rim looking north/northwest. D: View of lagoon from road near artificial cut on southern coast. All photos were taken in August 2005.

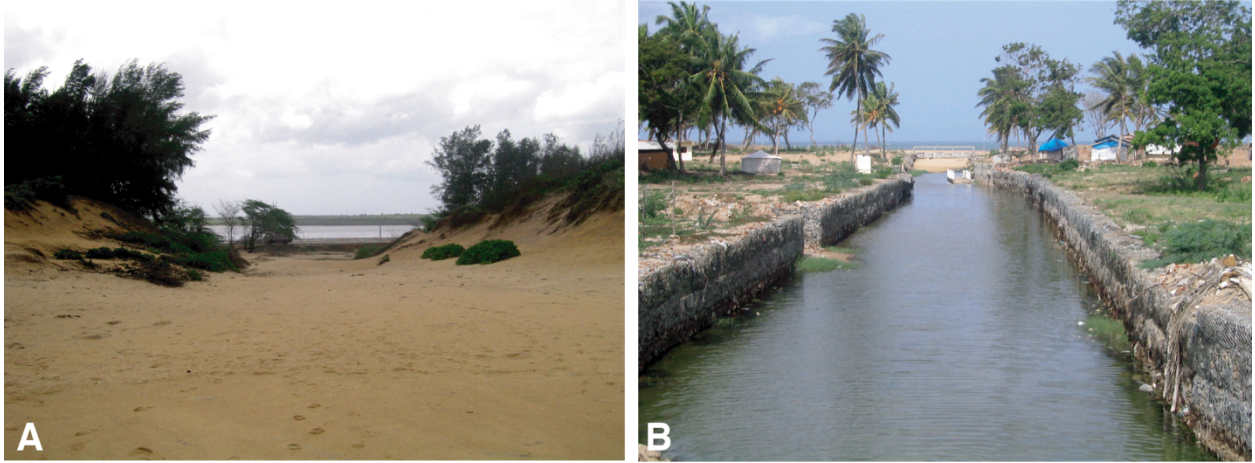

**Figure DR6.** A: Artificial cut created in 1998 to divert flooding on the southern coast of Karagan Lagoon (Stanzel et al., 2002). Photo is from the southern beach looking north with Karagan Lagoon in the background. B: The natural mouth of the lagoon runs through the town of Hambantota and was reinforced in 1998 with concrete walls to control the flow of water and prevent the town from flooding. Photos taken in August 2005.

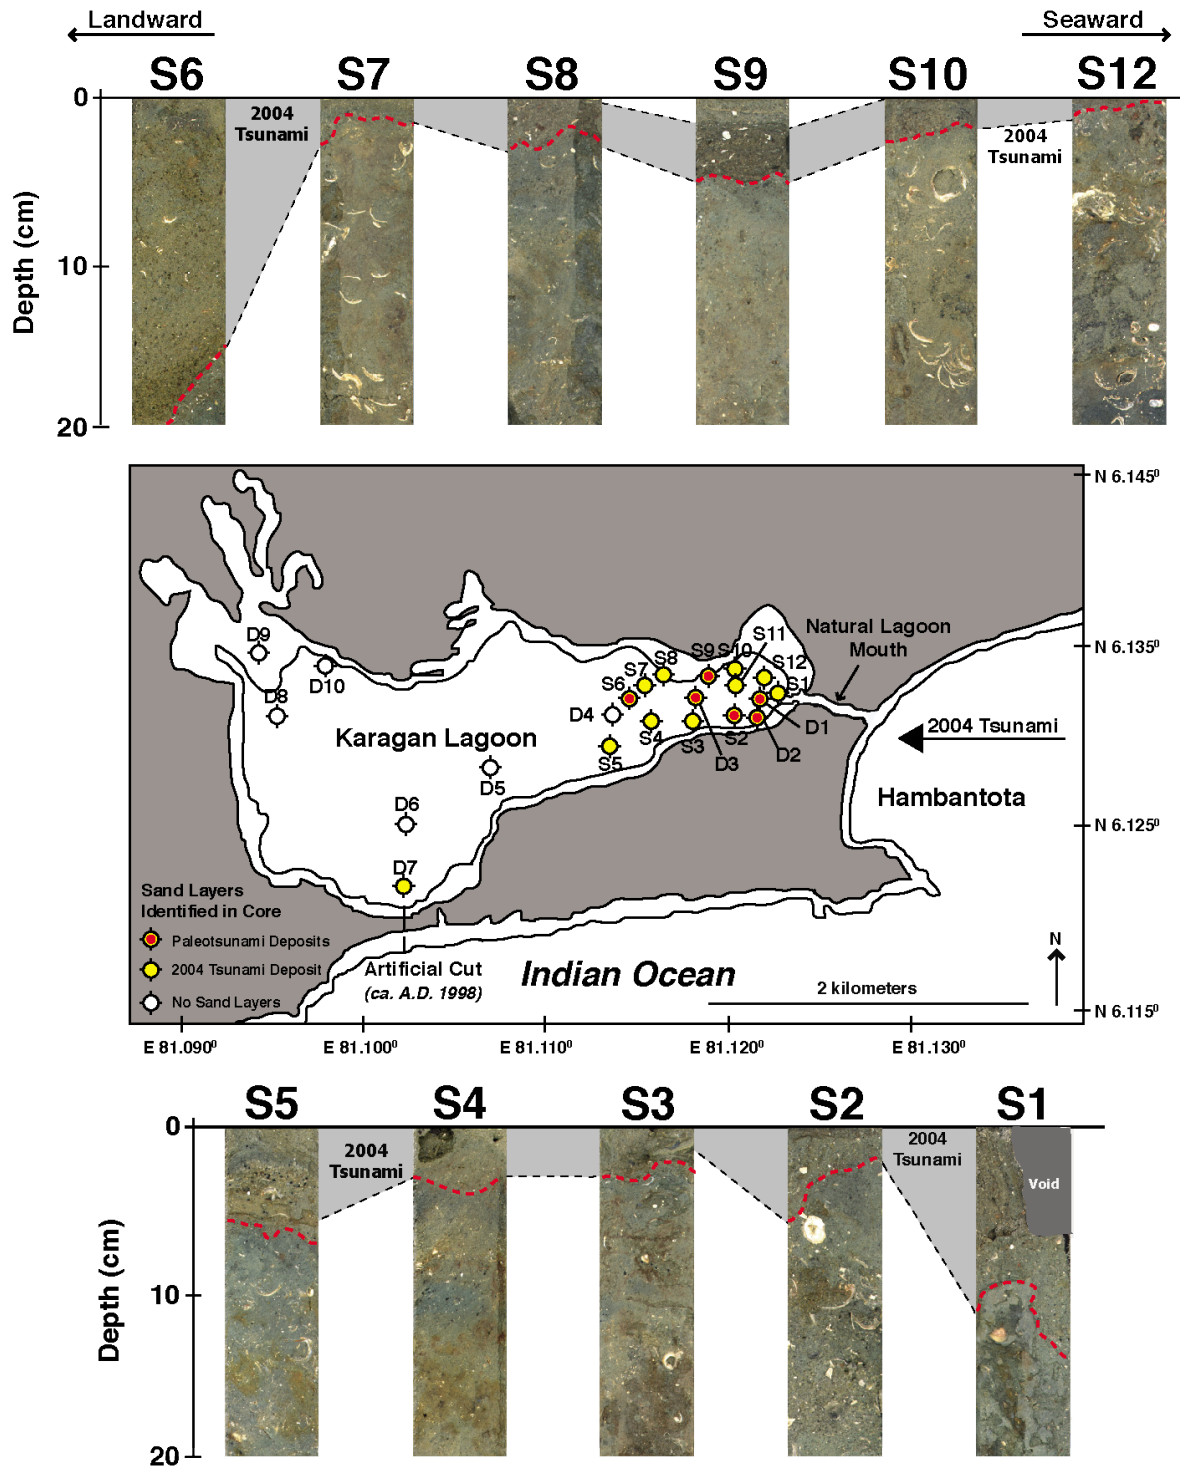

**Figure DR7.** Top 20 cm of short sediment cores from eastern Karagan Lagoon (locations indicated by circles on map). Red dashed line indicates the boundary between the normal lagoon sediment and the overlying 2004 tsunami deposit. The thickness of the 2004 tsunami layer varies between cores with the thickest layer in S6 (22 cm). The distance from core S5 to S1 is roughly 1 km with approximately 0.2 km of spacing between individual cores.

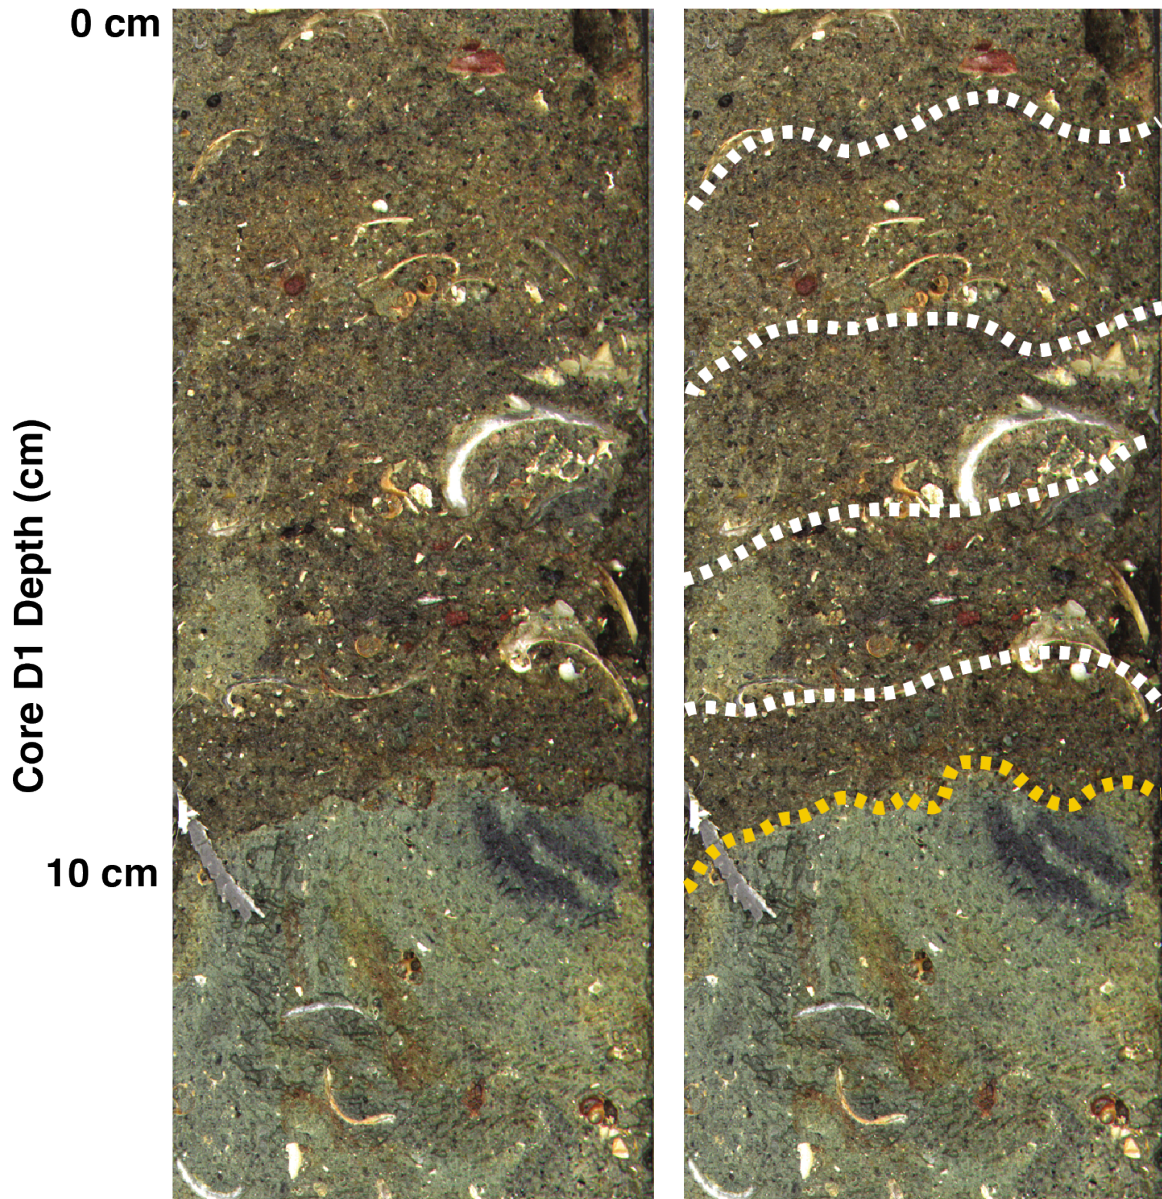

**Figure DR8.** The top portion of core D1 shows an illustrative example of the 26 December 2004 tsunami deposit featuring multiple cycles of grading. The deposit is 10 cm thick and the core is 6 cm in diameter. The left shows a core photograph; right shows the interpretation. Four faint nearly horizontal slightly darker layers are present in this coarse quartz sand unit (right: white dashed lines). The orange dashed line (right) marks the boundary between the lagoon sediments and the 2004 tsunami deposit.

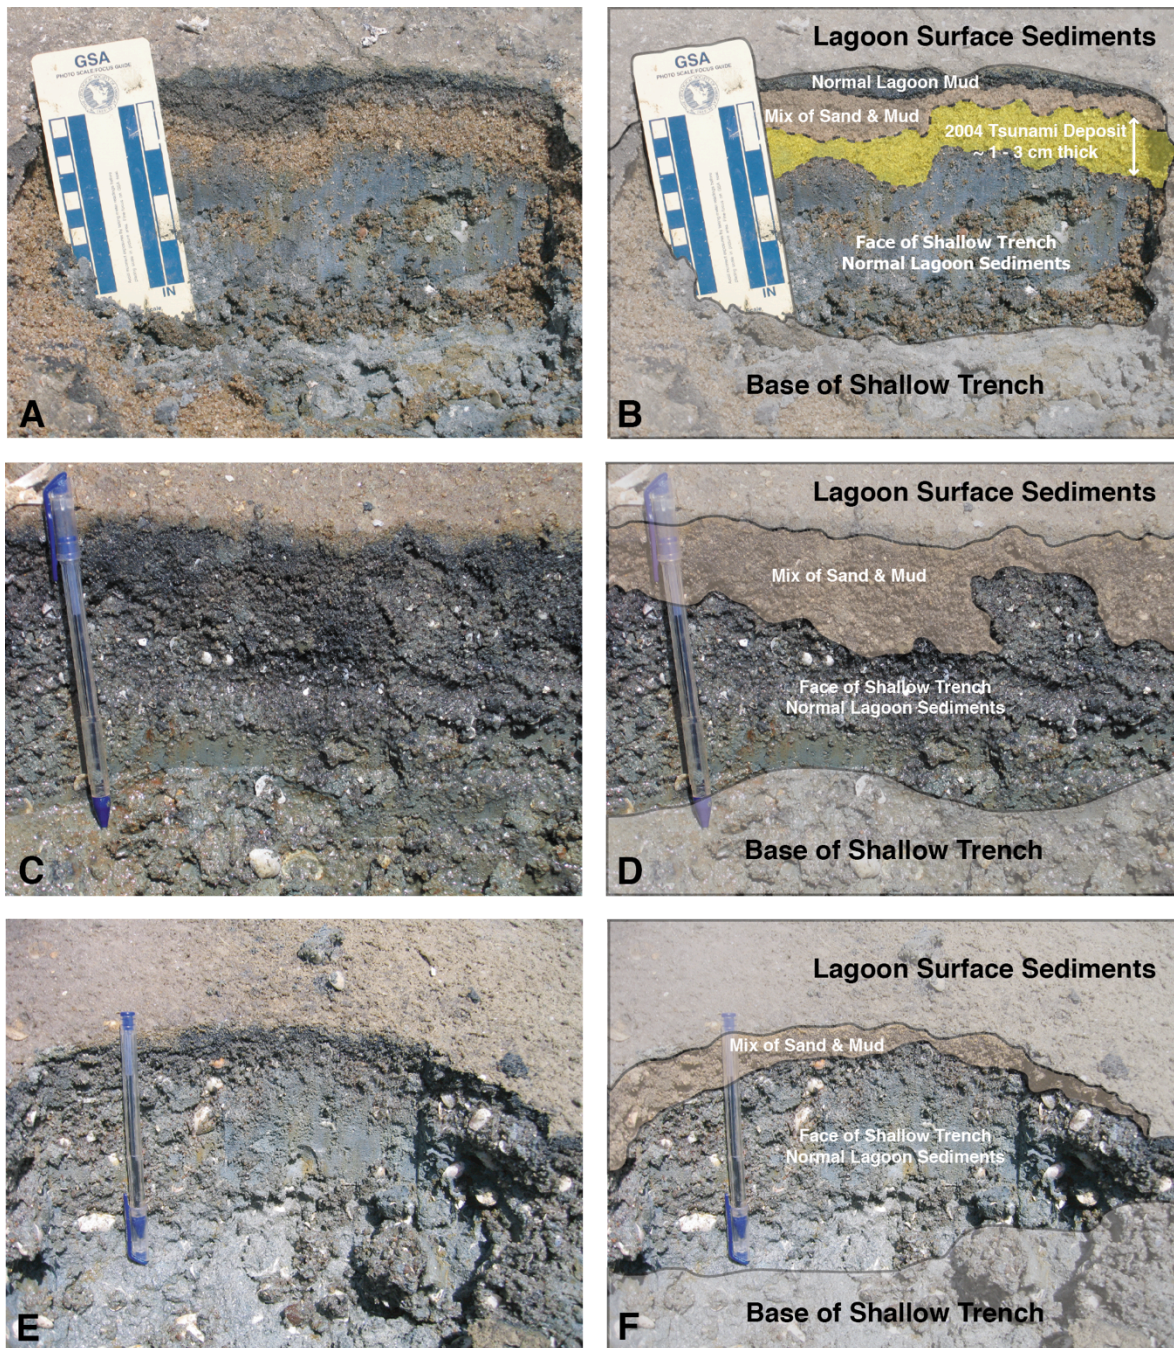

**Figure DR9.** Shallow trenches from tens of meters apart illustrate the variability of the 26 December 2004 tsunami deposit. A, C, and E show shallow trenches in Karagan Lagoon dug with a shovel at low water level in August 2005 in the vicinity of core D2. B, D, and F show interpreted sedimentary units. Note the 2004 layer is clearly visible in A-B and is approximately 1-3 cm thick. The upper gradational mixed sand and mud towards the surface in A-B, C-D, and E-F was also deposited by the 2004 tsunami. Pen for scale.

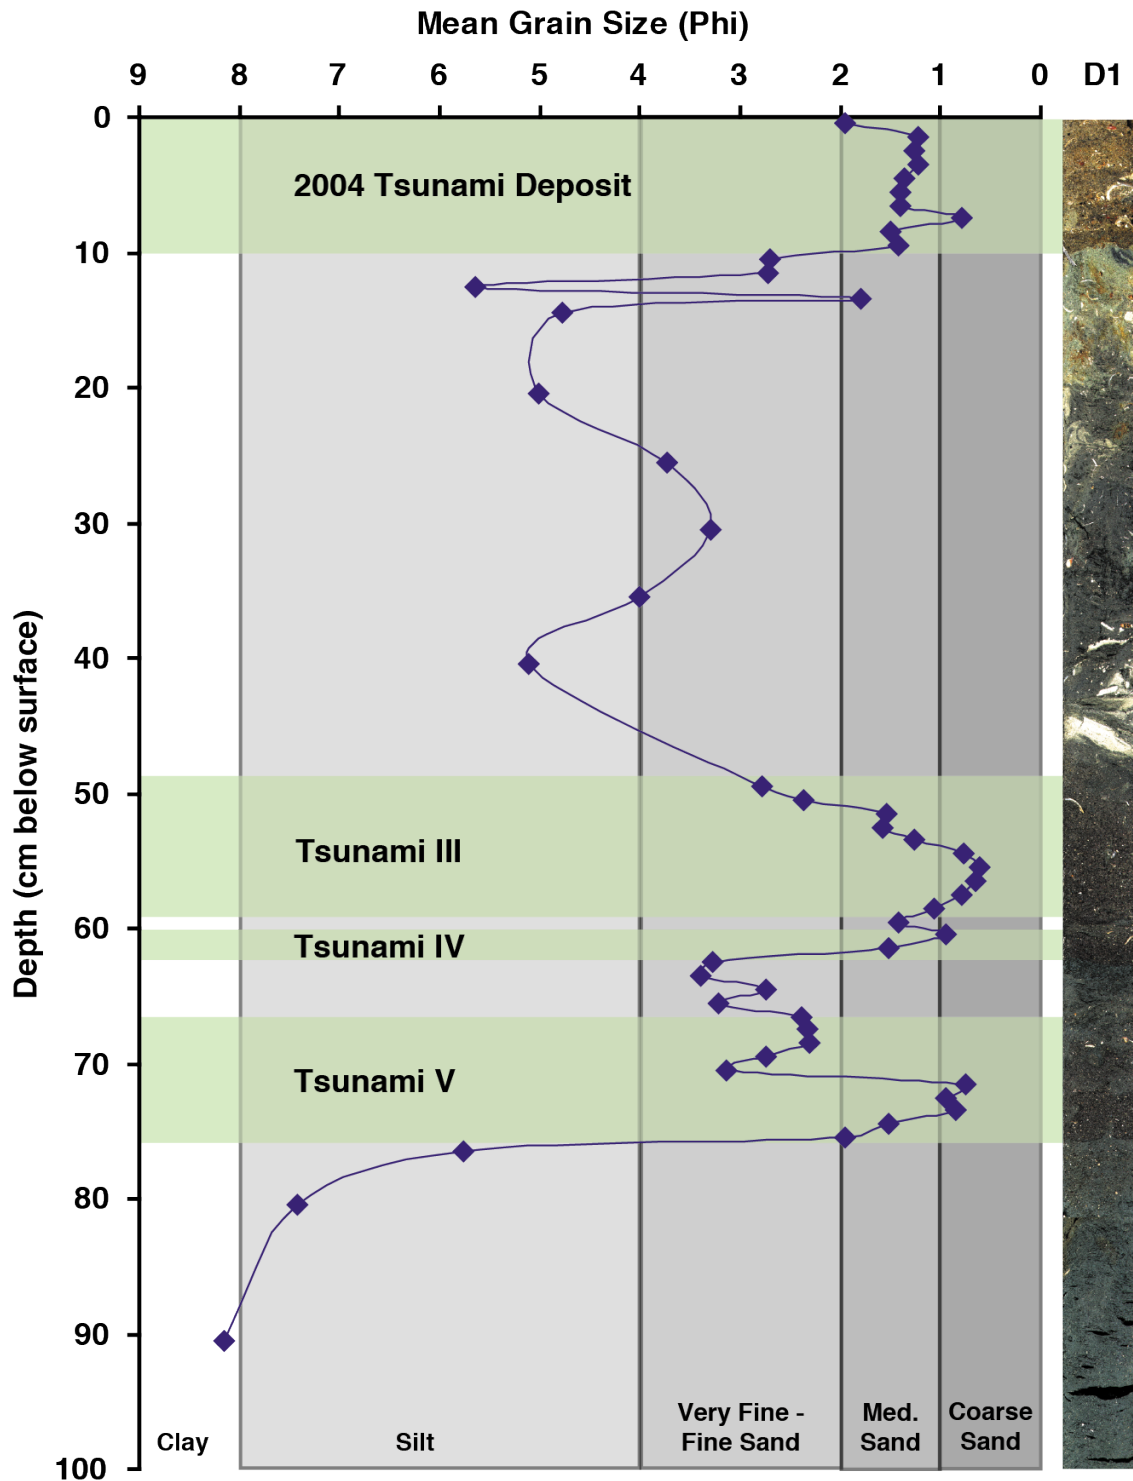

**Figure DR10.** Core D1 grain size. Mean grain size (phi) plotted against depth below surface of core in centimeters for the top meter of core D1. The mean grain size illustrates that this section of core is a mixture of silt (4-8 phi), very fine to fine sand (2-4 phi), medium sand (1-2 phi), and coarse sand (0-1 phi). Core photograph shown on right for reference.

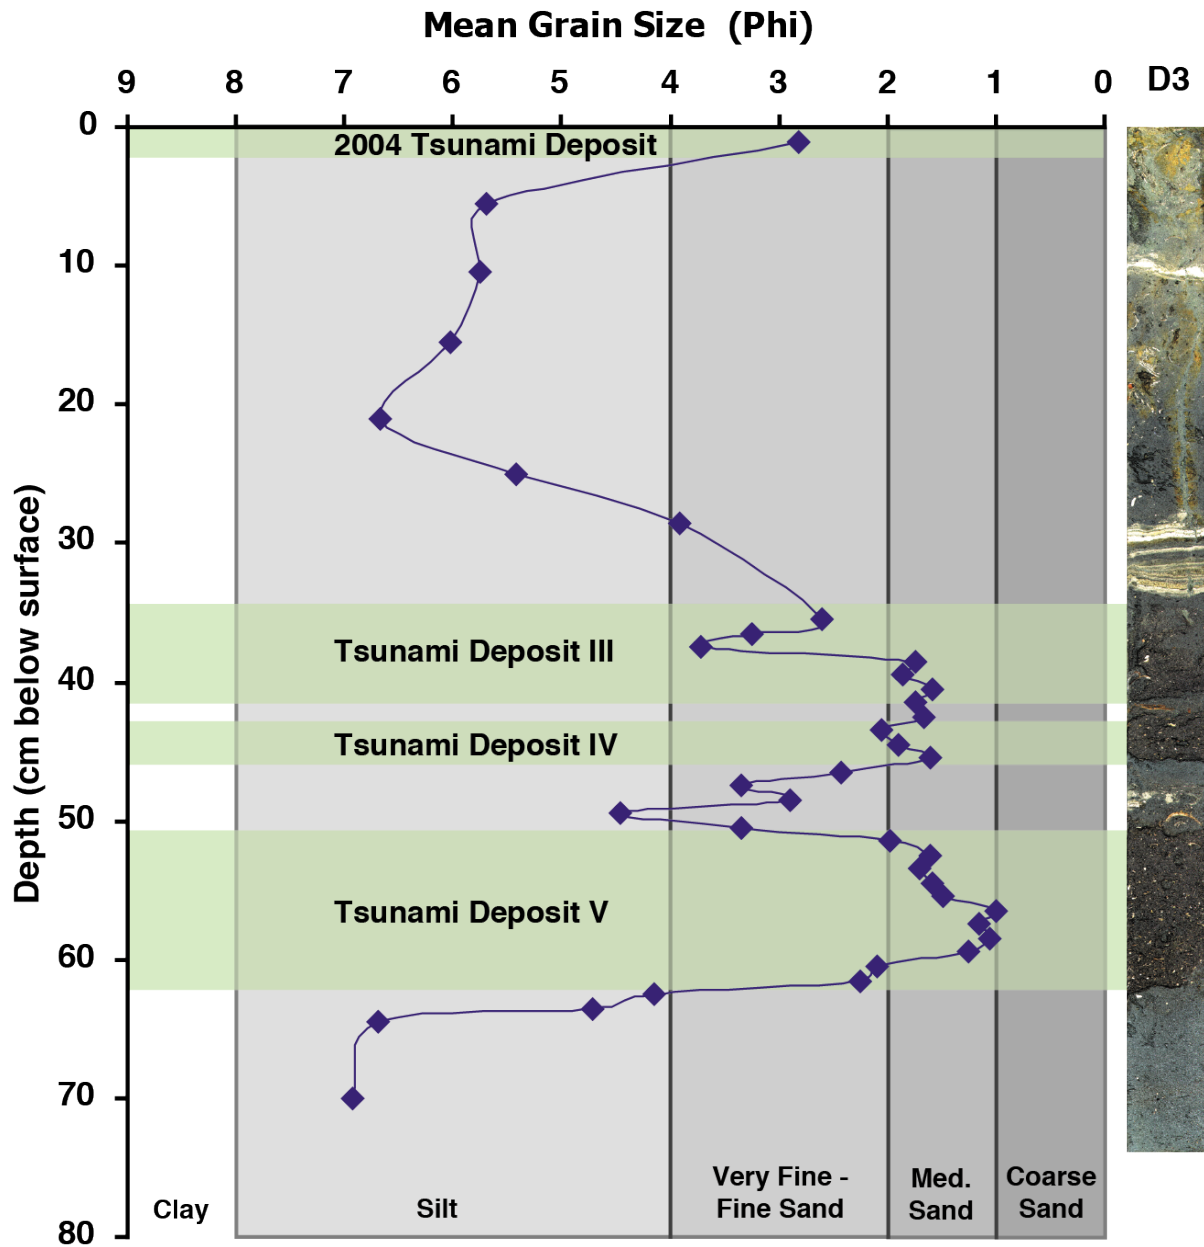

**Figure DR11.** Core D3 grain size. Mean grain size (phi) plotted against depth below surface of core in centimeters for core D3. The mean grain size illustrates that this section of core is a mixture of silt (4-8 phi), very fine to fine sand (2-4 phi), medium sand (1-2 phi), and coarse sand (0-1 phi). Core photograph shown on right for reference.

## **AMS Radiocarbon Dating**

Accelerator Mass Spectrometry (AMS) radiocarbon dating, conducted at Woods Hole National Ocean Sciences Accelerator Mass Spectrometry Facility (NOSAMS), was used to construct the relative chronology of the sand deposits to constrain the timing of paleotsunamis in Sri Lanka. Dated samples included bulk organic matter from lagoon sediment from five cores (D1, D2, D3, S2, and S9).

To avoid sampling material potentially transported by tsunami waves, bulk sediment samples were collected from immediately above (representing a minimum age) and immediately below (representing a maximum age) the sand deposits (Fig. DR12). The sediment was frozen, freeze-dried, weighed, and shipped to NOSAMS for analyses (Tables DR2, DR3). AMS radiocarbon age dates were calibrated with OxCal v. 4.1 (Oxcal; Bronk Ramsey, 2009) using calibration curve IntCal09 (Reimer et al., 2009). OxCal v. 4.1 standard default settings were used and the dates were outputted in calendar years before present  $\pm 2\sigma$  (cal. yr B.P.) with present defined as A.D. 1950. The resulting ages yields an event time range spanning from the youngest possible age (above the deposit) to the oldest possible age (below the deposit), where ages are reported as  $\mu \pm 2\sigma$  cal. yr B.P. (Tables DR2, DR3). The age of the sand deposit is estimated by taking the midpoint of the time range from the oldest to youngest  $\mu$  and rounding to the nearest hundredth year. Some sand deposits are less well constrained because only one sample below the deposit was dated. This age represents the oldest possible age of the sand deposit.

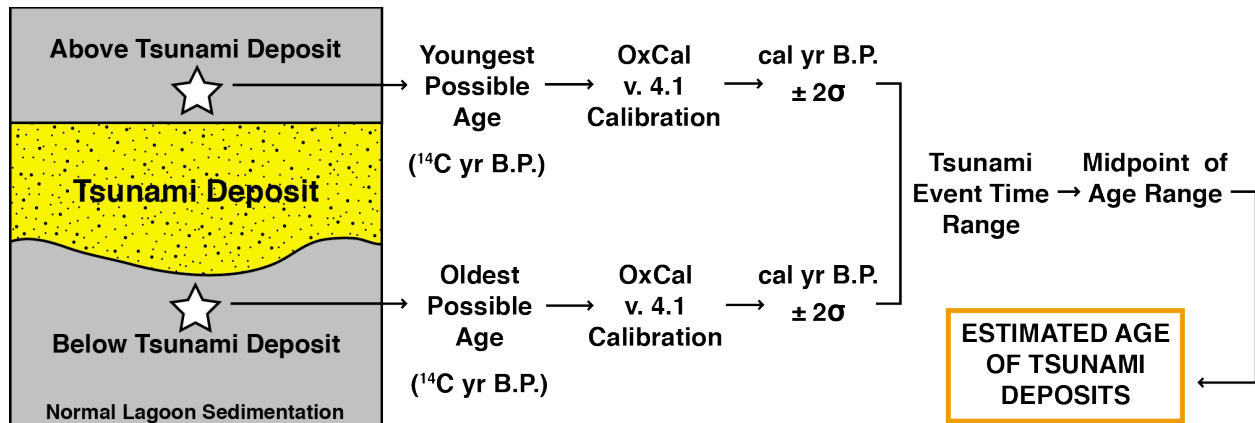

**Figure DR12.** Tsunami dating methodology. AMS radiocarbon dating of normal lagoon sediment from above and below the sand deposits was used to constrain the timing of sand events in Karagan Lagoon, Sri Lanka. The dates were calibrated using OxCal v. 4.1. The age of each tsunami deposit can be estimated by taking the midpoint between the oldest  $\mu$  and the youngest  $\mu$  and then rounding to the nearest hundredth year.

| TABLE DR2. KARAGAN LAGOON AGE DATES REPORTED IN RADIOCARBON YEARS BEFORE PRESENT AND CALIBRATED AGES REPORTED AS $\mu$ cal. yr B.P. $\pm 1\sigma$ AND $\pm 2\sigma$ |           |                                            |             |                            |                   |              |                                      |             |                                               |            |            |
|---------------------------------------------------------------------------------------------------------------------------------------------------------------------|-----------|--------------------------------------------|-------------|----------------------------|-------------------|--------------|--------------------------------------|-------------|-----------------------------------------------|------------|------------|
| Lagoon name                                                                                                                                                         | Core name | Corresponding<br>core name: Jackson (2008) | Sample name | NOSAMS<br>accession number | Depth in core (m) | Sample type  | $^{14}\text{C}$ yr B.P. <sup>†</sup> | Error $\pm$ | OxCal. 4.1<br>$\mu$ cal. yr B.P. <sup>§</sup> | 1 $\sigma$ | 2 $\sigma$ |
| Karagan Lagoon,<br>Sri Lanka                                                                                                                                        | D1        | SLHAM06DC1(1)S                             | DC1(1)S 1a  | OS-66115                   | 0.120 – 0.140     | Lagoonal Mud | 1460                                 | 40          | 1353                                          | 36         | 72         |
|                                                                                                                                                                     | D1        | SLHAM06DC1(1)S                             | DC1(1)S 2a  | OS-66116                   | 0.395 – 0.415     | Lagoonal Mud | 3720                                 | 40          | 4064                                          | 64         | 128        |
|                                                                                                                                                                     | D1        | SLHAM06DC1(1)S                             | DC1(1)S 3a  | OS-66117                   | 0.630 – 0.650     | Lagoonal Mud | 4070                                 | 35          | 4583                                          | 98         | 196        |
|                                                                                                                                                                     | D1        | SLHAM06DC1(1)S                             | DC1(1)S 7   | OS-67384                   | 0.755 – 0.770     | Lagoonal Mud | 4480                                 | 35          | 5152                                          | 89         | 178        |
|                                                                                                                                                                     | D1        | SLHAM06DC1(3)S                             | DC1(3)S 22  | OS-67385                   | 2.090 – 2.110     | Lagoonal Mud | 5450                                 | 35          | 6249                                          | 34         | 68         |
|                                                                                                                                                                     | D1        | SLHAM06DC1(3)S                             | DC1(3)S 23  | OS-67386                   | 2.815 – 2.835     | Lagoonal Mud | 5670                                 | 45          | 6455                                          | 59         | 118        |
|                                                                                                                                                                     | D1        | SLHAM06DC1(4)S                             | DC1(4)S 26  | OS-67387                   | 3.405 – 3.425     | Lagoonal Mud | 5850                                 | 40          | 6665                                          | 55         | 110        |
|                                                                                                                                                                     | D1        | SLHAM06DC1(4)S                             | DC1(4)S 25  | OS-67388                   | 3.975 – 3.990     | Lagoonal Mud | 6030                                 | 40          | 6874                                          | 58         | 116        |
|                                                                                                                                                                     | D3        | SLHAM06DC2(1)S                             | DC2(1)S 1a  | OS-66084                   | 0.030 – 0.050     | Lagoonal Mud | 2260                                 | 45          | 2250                                          | 61         | 122        |
|                                                                                                                                                                     | D3        | SLHAM06DC2(1)S                             | DC2(1)S 2a  | OS-60876                   | 0.260 – 0.280     | Lagoonal Mud | 3690                                 | 45          | 4029                                          | 67         | 134        |
|                                                                                                                                                                     | D3        | SLHAM06DC2(1)S                             | DC2(1)S 3a  | OS-60889                   | 0.480 – 0.500     | Lagoonal Mud | 4150                                 | 35          | 4695                                          | 76         | 152        |
|                                                                                                                                                                     | D3        | SLHAM06DC2(1)S                             | DC2(1)S 4a  | OS-60890                   | 0.660 – 0.680     | Lagoonal Mud | 4570                                 | 40          | 5227                                          | 111        | 222        |
|                                                                                                                                                                     | D3        | SLHAM06DC2(4)S                             | DC2(4)S 21  | OS-67389                   | 3.715 – 3.735     | Lagoonal Mud | 6000                                 | 40          | 6840                                          | 54         | 108        |
|                                                                                                                                                                     | S2        | SLHAM06(L1)S                               | L1S 1       | OS-67390                   | 0.020 – 0.040     | Lagoonal Mud | > Modern*                            | –           | –                                             | –          | –          |
|                                                                                                                                                                     | S2        | SLHAM06(L1)S                               | L1S 3       | OS-67364                   | 0.290 – 0.310     | Lagoonal Mud | 1860                                 | 45          | 1794 <sup>#</sup>                             | 56         | 112        |
|                                                                                                                                                                     | S2        | SLHAM06(L1)S                               | L1S 4       | OS-67400                   | 0.445 – 0.465     | Lagoonal Mud | 3900                                 | 40          | 4331                                          | 63         | 126        |
|                                                                                                                                                                     | S2        | SLHAM06(L1)S                               | L1S 5       | OS-67401                   | 0.565 – 0.585     | Lagoonal Mud | 4230                                 | 40          | 4764                                          | 70         | 140        |
|                                                                                                                                                                     | D2        | SLHAM05_H1S                                | H1SB        | OS-78611                   | 0.125 – 0.138     | Lagoonal Mud | 2370                                 | 35          | 2417                                          | 76         | 152        |
|                                                                                                                                                                     | D2        | SLHAM05_H1S                                | H1SC        | OS-78626                   | 0.143 – 0.145     | Bark/Plant   | > Modern*                            | –           | –                                             | –          | –          |
|                                                                                                                                                                     | D2        | SLHAM05_H1S                                | H1S 8       | OS-67705                   | 0.020 – 0.035     | Lagoonal Mud | 280                                  | 30          | 357                                           | 64         | 128        |
|                                                                                                                                                                     | D2        | SLHAM05_H1S                                | H1S 9       | OS-67708                   | 0.220 – 0.235     | Lagoonal Mud | 2820                                 | 35          | 2925                                          | 49         | 98         |
|                                                                                                                                                                     | D2        | SLHAM05_H2S                                | H2S 10      | OS-67680                   | 1.045 – 1.060     | Lagoonal Mud | 4840                                 | 55          | 5563                                          | 71         | 142        |
|                                                                                                                                                                     | D2        | SLHAM05_H2S                                | H2S 11      | OS-67706                   | 1.425 – 1.445     | Lagoonal Mud | 5210                                 | 35          | 5971                                          | 52         | 104        |
|                                                                                                                                                                     | D2        | SLHAM05_H2S                                | H2S 12      | OS-67707                   | 1.680 – 1.700     | Lagoonal Mud | 5410                                 | 55          | 6197                                          | 78         | 156        |
|                                                                                                                                                                     | D2        | SLHAM05_H3S                                | H3S 13      | OS-67709                   | 2.190 – 2.210     | Lagoonal Mud | 4980                                 | 45          | 5723                                          | 73         | 146        |
|                                                                                                                                                                     | D2        | SLHAM05_H4S                                | H4S 14      | OS-67710                   | 2.935 – 2.955     | Lagoonal Mud | 6120                                 | 35          | 7022                                          | 74         | 148        |
|                                                                                                                                                                     | D2        | SLHAM05_H5S                                | H5S 15      | OS-67711                   | 3.190 – 3.205     | Lagoonal Mud | 5640                                 | 35          | 6416                                          | 46         | 92         |
|                                                                                                                                                                     | D2        | SLHAM05_H5S                                | H5S 16      | OS-67712                   | 3.325 – 3.340     | Lagoonal Mud | 5880                                 | 35          | 6702                                          | 40         | 80         |
|                                                                                                                                                                     | D2        | SLHAM05_H6S                                | H6S 17      | OS-67713                   | 3.715 – 3.730     | Lagoonal Mud | 5800                                 | 40          | 6598                                          | 54         | 108        |
|                                                                                                                                                                     | S9        | SLHAM06_R2S                                | R2S 27      | OS-69910                   | 0.005 – 0.015     | Lagoonal Mud | 70                                   | 40          | 126                                           | 78         | 156        |
|                                                                                                                                                                     | S9        | SLHAM06_R2S                                | R2SB        | OS-78594                   | 0.006 – 0.018     | Lagoonal Mud | > Modern*                            | –           | –                                             | –          | –          |
|                                                                                                                                                                     | S9        | SLHAM06_R2S                                | R2S 18      | OS-67714                   | 0.080 – 0.100     | Lagoonal Mud | 350                                  | 30          | 401                                           | 53         | 106        |

*Note:* Assumed  $\delta^{13}\text{C}$  value of -25.00. Fraction Modern (Fm) is the measurement of the deviation of  $^{14}\text{C}/\text{C}$  ratio of a sample from “modern.”

\*Modern is defined as A.D. 1950 therefore “> Modern” implies to post-1950 deposition.  
<sup>†</sup>Raw AMS radiocarbon data reported in radiocarbon years before present ( $^{14}\text{C}$  yr B.P.).  
<sup>§</sup>Calibrated radiocarbon data using OxCal v. 4.1 (Bronk Ramsey, 2009) with calibration curve IntCal09 (Reimer et al., 2009) reported in  $\mu \pm 1\sigma$  and  $2\sigma$  calendar years before present (cal. yr B.P.).  
<sup>#</sup>Based on stratigraphy, this is not a reliable age date. Bioturbation in top portion of S2 could have affected this  $^{14}\text{C}$  date.

| TABLE DR3. KARAGAN LAGOON BULK ORGANIC RADIOCARBON DATES FROM LAGOONAL MUD AND ONE BARK SAMPLE. RAW DATA AND OXCAL 4.1 OUTPUT DATA |           |                                         |             |                         |                   |              |                         |         |      |      |      |      |      |      |      |      |      |      |     |                |   |
|------------------------------------------------------------------------------------------------------------------------------------|-----------|-----------------------------------------|-------------|-------------------------|-------------------|--------------|-------------------------|---------|------|------|------|------|------|------|------|------|------|------|-----|----------------|---|
| Lagoon name                                                                                                                        | Core name | Corresponding core name: Jackson (2008) | Sample name | NOSAMS accession number | Depth in core (m) | Sample type  | <sup>14</sup> C yr B.P. | Error ± | From | To   | %    | From | To   | %    | From | To   | %    | μ    | σ   | M <sup>†</sup> |   |
| Karagan Lagoon, Sri Lanka                                                                                                          | D1        | SLHAM06DC1(1)S                          | DC1(1)S 1a  | OS-66115                | 0.120–0.140       | Lagoonal Mud | 1460                    | 40      | 1376 | 1311 | 68.2 | 1411 | 1295 | 95.4 | 1518 | 1283 | 99.7 | 1353 | 36  | 1349           |   |
|                                                                                                                                    | D1        | SLHAM06DC1(1)S                          | DC1(1)S 2a  | OS-66116                | 0.395–0.415       | Lagoonal Mud | 3720                    | 40      | 4145 | 3988 | 68.2 | 4225 | 3929 | 95.3 | 4241 | 3897 | 99.7 | 4064 | 64  | 4061           |   |
|                                                                                                                                    | D1        | SLHAM06DC1(1)S                          | DC1(1)S 3a  | OS-66117                | 0.630–0.650       | Lagoonal Mud | 4070                    | 35      | 4784 | 4447 | 68.3 | 4806 | 4438 | 95.4 | 4818 | 4421 | 99.7 | 4583 | 98  | 4561           |   |
|                                                                                                                                    | D1        | SLHAM06DC1(1)S                          | DC1(1)S 7   | OS-67384                | 0.755–0.770       | Lagoonal Mud | 4480                    | 35      | 5280 | 5045 | 68.1 | 5291 | 4978 | 95.4 | 5310 | 4885 | 99.7 | 5152 | 89  | 5166           |   |
|                                                                                                                                    | D1        | SLHAM06DC1(3)S                          | DC1(3)S 22  | OS-67385                | 2.090–2.110       | Lagoonal Mud | 5450                    | 35      | 6293 | 6213 | 68.2 | 6302 | 6193 | 95.4 | 6395 | 6118 | 99.7 | 6249 | 34  | 6246           |   |
|                                                                                                                                    | D1        | SLHAM06DC1(3)S                          | DC1(3)S 23  | OS-67386                | 2.815–2.835       | Lagoonal Mud | 5670                    | 45      | 6496 | 6404 | 68.2 | 6600 | 6317 | 95.4 | 6635 | 6309 | 99.7 | 6455 | 59  | 6452           |   |
|                                                                                                                                    | D1        | SLHAM06DC1(4)S                          | DC1(4)S 26  | OS-67387                | 3.405–3.425       | Lagoonal Mud | 5850                    | 40      | 6734 | 6636 | 68.2 | 6776 | 6551 | 95.4 | 6795 | 6494 | 99.7 | 6665 | 55  | 6669           |   |
|                                                                                                                                    | D1        | SLHAM06DC1(4)S                          | DC1(4)S 25  | OS-67388                | 3.975–3.990       | Lagoonal Mud | 6030                    | 40      | 6936 | 6800 | 68.2 | 6984 | 6755 | 95.4 | 7154 | 6719 | 99.7 | 6874 | 58  | 6874           |   |
|                                                                                                                                    | D3        | SLHAM06DC2(1)S                          | DC2(1)S 1a  | OS-66084                | 0.030–0.050       | Lagoonal Mud | 2260                    | 45      | 2341 | 2180 | 68.2 | 2349 | 2153 | 95.4 | 2365 | 2109 | 99.7 | 2250 | 61  | 2238           |   |
|                                                                                                                                    | D3        | SLHAM06DC2(1)S                          | DC2(1)S 2a  | OS-60876                | 0.260–0.280       | Lagoonal Mud | 3690                    | 45      | 4136 | 3933 | 68.2 | 4150 | 3900 | 95.4 | 4235 | 3844 | 99.7 | 4029 | 67  | 4030           |   |
|                                                                                                                                    | D3        | SLHAM06DC2(1)S                          | DC2(1)S 3a  | OS-60889                | 0.480–0.500       | Lagoonal Mud | 4150                    | 35      | 4819 | 4616 | 68.2 | 4828 | 4571 | 95.4 | 4836 | 4526 | 99.7 | 4695 | 76  | 4693           |   |
|                                                                                                                                    | D3        | SLHAM06DC2(1)S                          | DC2(1)S 4a  | OS-60890                | 0.660–0.680       | Lagoonal Mud | 4570                    | 40      | 5436 | 5074 | 68.2 | 5445 | 5052 | 95.5 | 5467 | 5039 | 99.7 | 5227 | 111 | 5234           |   |
|                                                                                                                                    | D3        | SLHAM06DC2(4)S                          | DC2(4)S 21  | OS-67389                | 3.715–3.735       | Lagoonal Mud | 6000                    | 40      | 6893 | 6787 | 68.2 | 6945 | 6741 | 95.4 | 6992 | 6677 | 99.7 | 6840 | 54  | 6839           |   |
|                                                                                                                                    | S2        | SLHAM06(L1)S                            | L1S 1       | OS-67390                | 0.020–0.040       | Lagoonal Mud | > Modern*               | –       | –    | –    | –    | –    | –    | –    | –    | –    | –    | –    | –   | –              | – |
|                                                                                                                                    | S2        | SLHAM06(L1)S                            | L1S 3       | OS-67364                | 0.290–0.310       | Lagoonal Mud | 1860                    | 45      | 1864 | 1732 | 68.2 | 1897 | 1698 | 95.4 | 1948 | 1614 | 99.7 | 1794 | 56  | 1795           |   |
|                                                                                                                                    | S2        | SLHAM06(L1)S                            | L1S 4       | OS-67400                | 0.445–0.465       | Lagoonal Mud | 3900                    | 40      | 4415 | 4291 | 68.2 | 4430 | 4160 | 95.3 | 4516 | 4151 | 99.7 | 4331 | 63  | 4334           |   |
|                                                                                                                                    | S2        | SLHAM06(L1)S                            | L1S 5       | OS-67401                | 0.565–0.585       | Lagoonal Mud | 4230                    | 40      | 4851 | 4709 | 68.2 | 4863 | 4627 | 95.4 | 4957 | 4570 | 99.7 | 4764 | 70  | 4752           |   |
|                                                                                                                                    | D2        | SLHAM05_H1S                             | H1SB        | OS-78611                | 0.125–0.138       | Lagoonal Mud | 2370                    | 35      | 2456 | 2343 | 68.2 | 2675 | 2335 | 95.4 | 2701 | 2313 | 99.7 | 2417 | 76  | 2405           |   |
|                                                                                                                                    | D2        | SLHAM05_H1S                             | H1SC        | OS-78626                | 0.143–0.145       | Bark/Plant   | > Modern*               | –       | –    | –    | –    | –    | –    | –    | –    | –    | –    | –    | –   | –              | – |
|                                                                                                                                    | D2        | SLHAM05_H1S                             | H1S 8       | OS-67705                | 0.020–0.035       | Lagoonal Mud | 280                     | 30      | 427  | 291  | 68.2 | 452  | 155  | 95.3 | 480  | -4   | 99.7 | 357  | 64  | 372            |   |
|                                                                                                                                    | D2        | SLHAM05_H1S                             | H1S 9       | OS-67708                | 0.220–0.235       | Lagoonal Mud | 2820                    | 35      | 2960 | 2870 | 68.2 | 3063 | 2845 | 95.4 | 3078 | 2784 | 99.7 | 2925 | 49  | 2923           |   |
|                                                                                                                                    | D2        | SLHAM05_H2S                             | H2S 10      | OS-67680                | 1.045–1.060       | Lagoonal Mud | 4840                    | 55      | 5644 | 5482 | 68.2 | 5711 | 5335 | 95.4 | 5744 | 5325 | 99.7 | 5563 | 71  | 5582           |   |
|                                                                                                                                    | D2        | SLHAM05_H2S                             | H2S 11      | OS-67706                | 1.425–1.445       | Lagoonal Mud | 5210                    | 35      | 5990 | 5925 | 68.2 | 6172 | 5907 | 95.4 | 6180 | 5894 | 99.7 | 5971 | 52  | 5962           |   |
|                                                                                                                                    | D2        | SLHAM05_H2S                             | H2S 12      | OS-67707                | 1.680–1.700       | Lagoonal Mud | 5410                    | 55      | 6288 | 6130 | 68.2 | 6303 | 6005 | 95.4 | 6396 | 5990 | 99.7 | 6197 | 78  | 6216           |   |
|                                                                                                                                    | D2        | SLHAM05_H3S                             | H3S 13      | OS-67709                | 2.190–2.210       | Lagoonal Mud | 4980                    | 45      | 5844 | 5645 | 68.2 | 5889 | 5604 | 95.4 | 5900 | 5596 | 99.7 | 5723 | 73  | 5708           |   |
|                                                                                                                                    | D2        | SLHAM05_H4S                             | H4S 14      | OS-67710                | 2.935–2.955       | Lagoonal Mud | 6120                    | 35      | 7154 | 6938 | 68.2 | 7158 | 6906 | 95.4 | 7166 | 6858 | 99.7 | 7022 | 74  | 7002           |   |
|                                                                                                                                    | D2        | SLHAM05_H5S                             | H5S 15      | OS-67711                | 3.190–3.205       | Lagoonal Mud | 5640                    | 35      | 6472 | 6354 | 68.2 | 6493 | 6317 | 95.4 | 6547 | 6303 | 99.7 | 6416 | 46  | 6422           |   |
|                                                                                                                                    | D2        | SLHAM05_H5S                             | H5S 16      | OS-67712                | 3.325–3.340       | Lagoonal Mud | 5880                    | 35      | 6737 | 6666 | 68.2 | 6787 | 6636 | 95.4 | 6846 | 6556 | 99.7 | 6702 | 40  | 6702           |   |
|                                                                                                                                    | D2        | SLHAM05_H6S                             | H6S 17      | OS-67713                | 3.715–3.730       | Lagoonal Mud | 5800                    | 40      | 6661 | 6554 | 68.2 | 6717 | 6493 | 95.4 | 6741 | 6451 | 99.7 | 6598 | 54  | 6600           |   |
|                                                                                                                                    | S9        | SLHAM06_R2S                             | R2S 27      | OS-69910                | 0.005–0.015       | Lagoonal Mud | 70                      | 40      | 254  | 33   | 68.3 | 268  | 18   | 95.4 | 281  | 7    | 99.7 | 126  | 78  | 107            |   |
|                                                                                                                                    | S9        | SLHAM06_R2S                             | R2SB        | OS-78594                | 0.006–0.018       | Lagoonal Mud | > Modern*               | –       | –    | –    | –    | –    | –    | –    | –    | –    | –    | –    | –   | –              | – |
|                                                                                                                                    | S9        | SLHAM06_R2S                             | R2S 18      | OS-67714                | 0.080–0.100       | Lagoonal Mud | 350                     | 30      | 470  | 320  | 68.2 | 494  | 315  | 95.4 | 503  | 306  | 99.7 | 401  | 53  | 395            |   |

\*Modern is defined as A.D. 1950.

†Median.

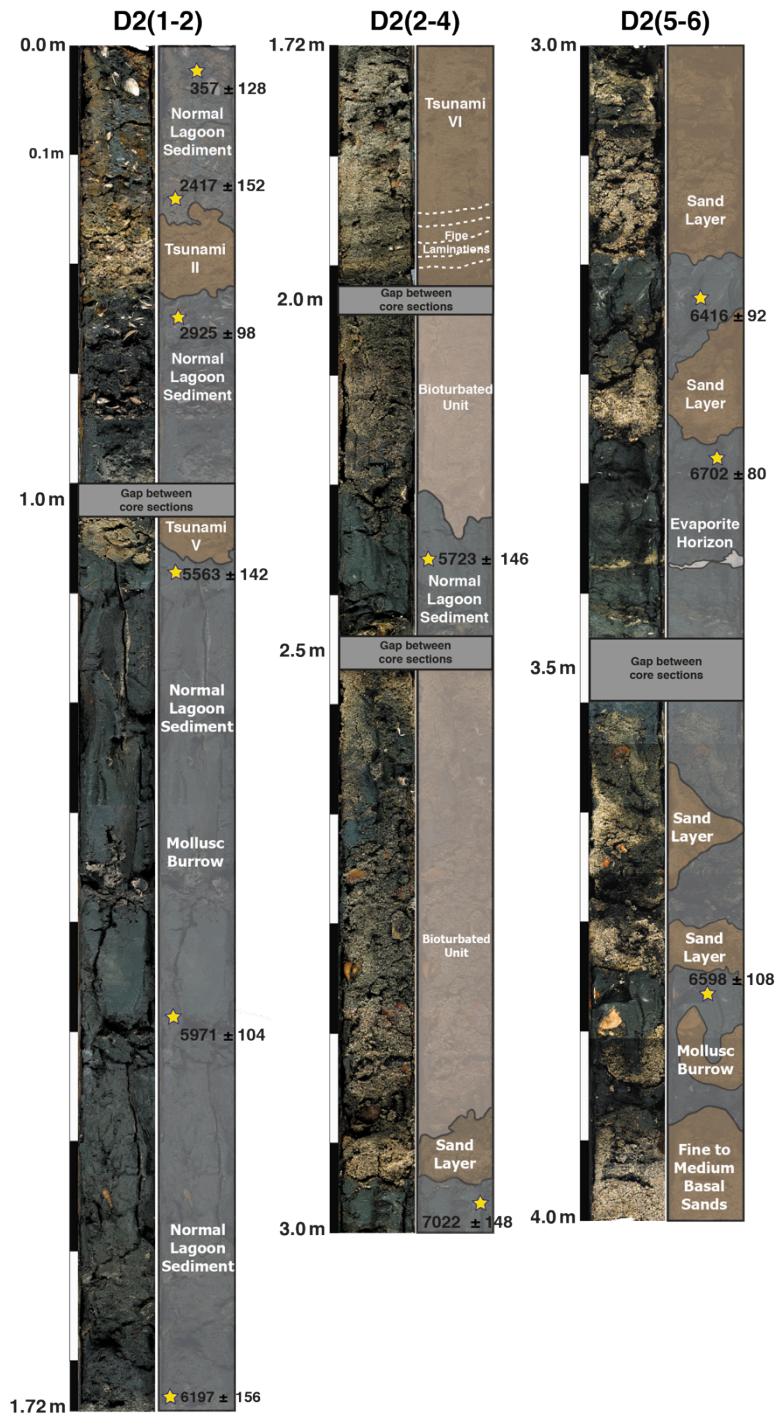

**Figure DR13.** Photographs and interpretations of core D2 from Karagan Lagoon. Yellow stars indicate where samples were dated using AMS radiocarbon analyses (Tables DR2, DR3); text indicates calibrated age of the bulk organic content as  $\mu \pm 2\sigma$  cal. yr B.P. Core D2 features numerous sand layers from 2.0-4.0 m though extensive bioturbation and possible disturbance during coring caused age reversals in the sediment therefore these layers can not be properly correlated to cores D1 and D3. All depths are reported in m below lagoon sediment surface; the lower 2.0 m of core were cored in 0.5 m sections.

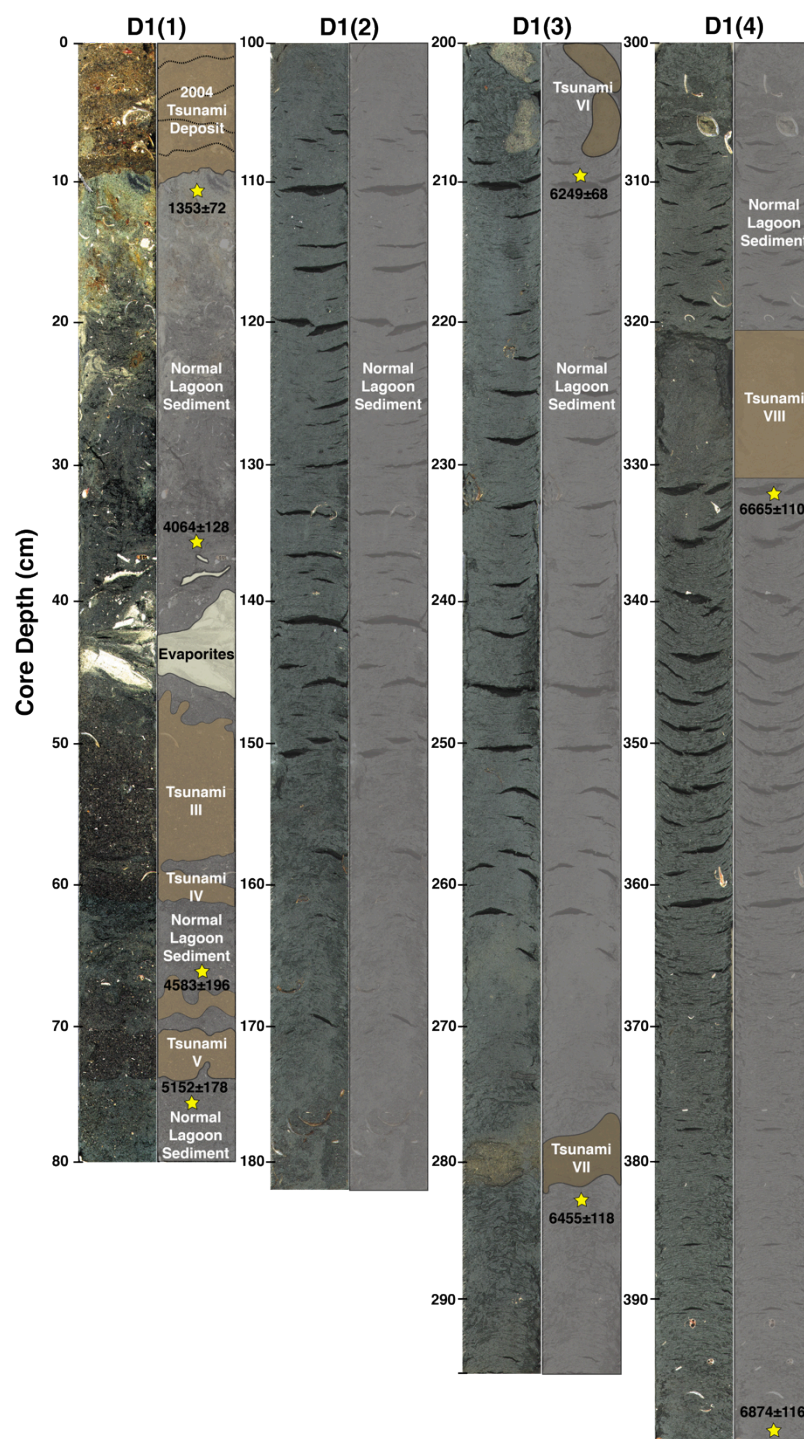

**Figure DR14.** Core D1 photographs and interpretation. Yellow stars indicate where samples were collected to conduct AMS radiocarbon dating (Tables DR2, DR3); text indicates calibrated age of the bulk organic content presented as  $\mu \pm 2\sigma$  cal. yr B.P. Numbers in parentheses (e.g. D1(3) indicates core D1, section 3). All depths are reported in cm below lagoon sediment surface where each new section starts a new meter of core.

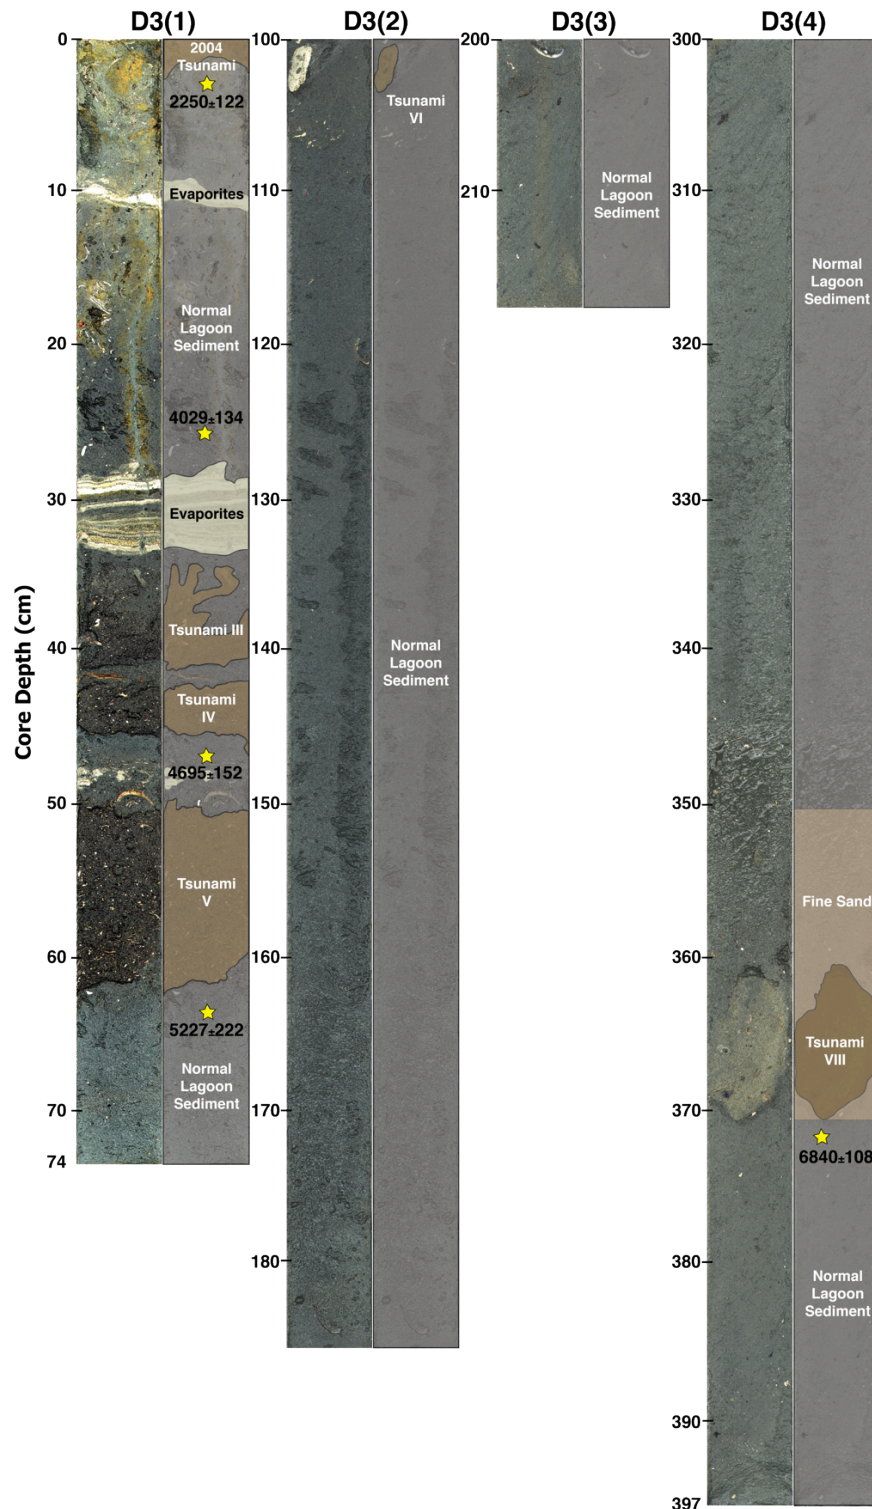

**Figure DR15.** Core D3 photographs and interpretation. Yellow stars indicate where samples were collected to conduct AMS radiocarbon dating (Tables DR2, DR3); text indicates calibrated age of the bulk organic content  $\mu \pm 2\sigma$  cal. yr B.P. Numbers in parentheses (e.g. D3(3) indicates core D3, section 3). All depths are reported in cm below lagoon sediment surface where each new section starts a new meter of core.

TABLE DR4. REGIONAL INDIAN OCEAN TSUNAMI RECORDS COMPARED TO KARAGAN LAGOON, SRI LANKA

| Location                           | Paleotsunami events | Material dated                                                     | Dating method                          | <sup>14</sup> C yr B.P.*                                                                                      | Reported calibrated ages <sup>†</sup>                                 | Possible correlation to this study                              | Reference                |
|------------------------------------|---------------------|--------------------------------------------------------------------|----------------------------------------|---------------------------------------------------------------------------------------------------------------|-----------------------------------------------------------------------|-----------------------------------------------------------------|--------------------------|
| Okanda and Kirinda, Sri Lanka      | 1                   | Bulk organic matter, inorganic CaCO <sub>3</sub> , woods, molluscs | <sup>14</sup> C                        | Table 7.1, Fig. 7.39 of reference                                                                             | ~4200 cal. yr B.P. <sup>§</sup>                                       | Karagan Tsunami III                                             | Ranasinghage, 2010       |
|                                    | 2                   |                                                                    |                                        |                                                                                                               | ~4500 cal. yr B.P. <sup>§</sup>                                       | Karagan Tsunami IV                                              |                          |
|                                    | 3                   |                                                                    |                                        |                                                                                                               | ~5000 cal. yr B.P. <sup>§</sup>                                       | Karagan Tsunami V                                               |                          |
| Panama Lagoon, Sri Lanka           | 4 (Panama P12-1)    | Bulk organic matter                                                | Thermo-Luminescence (TL)               | N/A                                                                                                           | 6817 ± 132 cal. yr B.P.                                               | Karagan Tsunami VIII(?)                                         | Abeyratne et al., 2007   |
| Kirinda Estuary, Sri Lanka         | 1                   | Sand Grains                                                        |                                        |                                                                                                               | 1682 ± 126, 1637 ± 122 cal. yr B.P.                                   | No correlation                                                  |                          |
|                                    | 2                   | Sand Grains                                                        |                                        |                                                                                                               | 4829 ± 362 cal. yr B.P.                                               | Karagan Tsunami V                                               |                          |
| Peraliya Lagoon, Sri Lanka         | 3                   | Sand Grains                                                        | <sup>14</sup> C                        | CaCO <sub>3</sub> : 2187 ± 392<br>Organic: 539 ± 233<br>CaCO <sub>3</sub> : 4380 ± 354<br>Organic: 2129 ± 162 | 829 ± 62, 1745 ± 130, 2667 ± 200, 4606 ± 345 cal. yr B.P.             | Dating too inconsistent to correlate                            | Dahanayake et al., 2011  |
|                                    | 1 (30 cm deep)      | Sediment separated into carbonate & organic fractions              |                                        |                                                                                                               | CaCO <sub>3</sub> : 1670 ± 440<br>Organic: 130 ± 130                  | No correlation;<br>Dating inconclusive                          |                          |
|                                    | 2 (75 cm deep)      |                                                                    |                                        |                                                                                                               | CaCO <sub>3</sub> : 4350 ± 470<br>Organic: 1560 ± 190                 | No correlation;<br>Dating inconclusive                          |                          |
| Mamallapuram, Southeastern India   | 1 (S1)              | Charcoal Piece (above & below tsunami)                             | <sup>14</sup> C                        | 955 ± 30                                                                                                      | A.D. 1019-1161                                                        | No correlation                                                  | Rajendran et al., 2006   |
|                                    | 2 (S2)              |                                                                    |                                        | 1581 ± 35 – 1674 ± 30                                                                                         | (A.D. 405-564)- (A.D. 321-421); Reported as ~1000 and ~1500 years ago | No correlation                                                  |                          |
| Kaveripattinam, Southeastern India | 1                   | Sediment                                                           | Optically stimulated luminescence date | N/A                                                                                                           | 1091 ± 66 cal. yr B.P.                                                | No correlation                                                  | Rajendran et al., 2011   |
|                                    |                     | Pottery Shards                                                     | Thermoluminescence                     | N/A                                                                                                           | 993 ± 73 cal. yr B.P.                                                 |                                                                 |                          |
| Andaman and Nicobar Islands        | “At least 1”        | Mangrove roots, peat, wood, gastropods, coral fragments            | <sup>14</sup> C                        | Table 5 of reference                                                                                          | 900-1000 years ago                                                    | No correlation                                                  | Rajendran et al., 2007   |
| Andaman and Nicobar Islands        | 1                   | Coral Breccias & Peaty Sand                                        | <sup>14</sup> C                        | Tables 1 and 2 of reference                                                                                   | A.D. 1881                                                             | No correlation                                                  | Rajendran et al., 2013   |
|                                    | 2                   |                                                                    |                                        |                                                                                                               | A.D. 1762                                                             | No correlation                                                  |                          |
|                                    | 3                   | Unclear                                                            |                                        |                                                                                                               | A.D. 1250-1450                                                        | No correlation                                                  |                          |
|                                    | 4                   | Paleo-Mangrove Root Horizon                                        |                                        |                                                                                                               | A.D. 770-1040                                                         | No correlation                                                  |                          |
|                                    | 5                   | Mollusc                                                            |                                        |                                                                                                               | A.D. 430-750                                                          | No correlation                                                  |                          |
|                                    | 6                   | Mollusc                                                            |                                        |                                                                                                               | BC 20-A.D. 440                                                        | No correlation                                                  |                          |
| Rasdho Atoll, Maldives             | 1                   | Bulk organic carbon, corals                                        | <sup>14</sup> C                        | Table 1 of reference                                                                                          | 420-890 cal. yr B.P.                                                  | No correlation                                                  | Klostermann et al., 2014 |
|                                    | 2                   |                                                                    |                                        |                                                                                                               | 890-1560 cal. yr B.P.                                                 | No correlation                                                  |                          |
|                                    | 3                   |                                                                    |                                        |                                                                                                               | 2040-2340 cal. yr B.P.                                                | No correlation                                                  |                          |
|                                    | 4                   |                                                                    |                                        |                                                                                                               | 2420-3380 cal. yr B.P.                                                | Karagan Tsunami II                                              |                          |
|                                    | 5                   |                                                                    |                                        |                                                                                                               | 3890-4330 cal. yr B.P.                                                | Karagan Tsunami III                                             |                          |
|                                    | 6                   |                                                                    |                                        |                                                                                                               | 5480-5760 cal. yr B.P.                                                | No correlation;<br>Event 6 (Maldives) is only found in one core |                          |

TABLE DR4. REGIONAL INDIAN OCEAN TSUNAMI RECORDS COMPARED TO KARAGAN LAGOON, SRI LANKA (CONTINUED)

| Location                                    | Paleotsunami events | Material dated                                                            | Dating method   | <sup>14</sup> C yr B.P.*                 | Reported calibrated ages <sup>†</sup> | Possible correlation to this study | Reference                 |
|---------------------------------------------|---------------------|---------------------------------------------------------------------------|-----------------|------------------------------------------|---------------------------------------|------------------------------------|---------------------------|
| Meulaboh,<br>Northern Sumatra,<br>Indonesia | 1 (Unit A)          | Wood<br>(below sand unit)                                                 | <sup>14</sup> C | < 190 ± 40 –<br>270 ± 40                 | A.D. 1907                             | No correlation                     | Monecke et al., 2008      |
|                                             | 2 (Unit B)          | Wood<br>(above & below sand unit)                                         | <sup>14</sup> C | 250 ± 40 –<br>620 ± 40                   | A.D. 780-990                          | No correlation                     |                           |
|                                             | 3 (Unit C)          | Wood and<br>plant debris<br>(above & below sand unit)                     | <sup>14</sup> C | (830 ± 40 –<br>960 ± 40)<br>to 1130 ± 40 | A.D. 1290-1400                        | No correlation                     |                           |
| Northern Sumatra,<br>Indonesia              | 1                   | Wood, gastropod                                                           | <sup>14</sup> C | Table 1 of reference                     | 6500-7000 cal. yr B.P.                | Karagan Tsunami VIII               | Grand Pre et al.,<br>2012 |
| Phra Thong Island,<br>Thailand              | 1 (Sheet B)         | Bark<br>(below sand sheet B)                                              | <sup>14</sup> C | < 530 ± 40 –<br>570 ± 40                 | 550-700 sidereal yr B.P.              | No correlation                     | Jankaew et al.,<br>2008   |
|                                             | 2 (Sheet C)         | Bark<br>(below sand sheet C)                                              | <sup>14</sup> C | < 2250 ± 40                              | < 2200-2400<br>sidereal yr B.P.       | Karagan Tsunami II                 |                           |
| Ban Bang Sak, Thailand                      | 1                   | Wood, plant fragments,<br>charcoal, shells                                | <sup>14</sup> C | Tables 1 and 2<br>of reference           | 500-700 cal. yr B.P.                  | No correlation                     | Brill et al., 2011        |
|                                             | 2 (C1, C2)          |                                                                           |                 |                                          | 1180-1350 cal. yr B.P. <sup>‡</sup>   | No correlation                     |                           |
|                                             | 3 (C3)              |                                                                           |                 |                                          | < 2000 cal. yr B.P. <sup>‡</sup>      | No correlation                     |                           |
| Andaman Coast,<br>Thailand                  | 1                   | Above and below: Bark,<br>wood, twigs<br>Within: Shell, piece of<br>coral | <sup>14</sup> C | Table 4 of reference                     | 2720-4290 cal. yr B.P.                | Karagan Tsunami II or III          | Rhodes et al., 2011       |

\*Radiocarbon years before present where present is defined as A.D. 1950.

<sup>†</sup>Calibrated ages reported by corresponding reference. Noted as reported (for example A.D. or cal. yr B.P.).<sup>‡</sup>Estimated/rounded based on numerous radiocarbon dates. See Ch. 7, Ranasinghage (2010).<sup>#</sup>Brill et al. (2011) reports these layers could be deposited by paleotsunamis or storms.

TABLE DR5. RECURRENCE INTERVALS OF TSUNAMI DEPOSITS IN KARAGAN LAGOON, SRI LANKA

| Time periods<br>(cal. yr B.P.)                 | Number of<br>tsunamis | Minimum date<br>$\mu \pm 2\sigma$ | Maximum date<br>$\mu \pm 2\sigma$ | Minimum age above<br>cal. yr B.P.<br>(min $\mu - 2\sigma$ ) | Maximum age above<br>cal. yr B.P.<br>(min $\mu + 2\sigma$ ) | Minimum age below<br>cal. yr B.P.<br>(max $\mu - 2\sigma$ ) | Maximum age below<br>cal. yr B.P.<br>(max $\mu + 2\sigma$ ) | Mean<br>recurrence<br>interval (yr) | Shortest<br>recurrence<br>interval (yr) | Longest<br>recurrence<br>interval (yr) | Recurrence<br>interval<br>difference<br>$\pm$ (yr) |
|------------------------------------------------|-----------------------|-----------------------------------|-----------------------------------|-------------------------------------------------------------|-------------------------------------------------------------|-------------------------------------------------------------|-------------------------------------------------------------|-------------------------------------|-----------------------------------------|----------------------------------------|----------------------------------------------------|
| 0-3000                                         | 2 (I-II)              | Present*                          | 2925 $\pm$ 98                     | 0*                                                          | 0*                                                          | 2827                                                        | 3023                                                        | <b>1463</b>                         | 1414                                    | 1512                                   | $\pm$ 49                                           |
| 0-4000                                         | 2 (I-II)              | Present*                          | 4064 $\pm$ 128                    | 0*                                                          | 0*                                                          | 3936                                                        | 4192                                                        | <b>2032</b>                         | 1968                                    | 2096                                   | $\pm$ 64                                           |
| 0-7000                                         | 8 (I-VIII)            | Present*                          | 6665 $\pm$ 110                    | 0*                                                          | 0*                                                          | 6555                                                        | 6775                                                        | <b>833</b>                          | 819                                     | 847                                    | $\pm$ 14                                           |
| 4000-5500 <sup>†</sup>                         | 3<br>(III, IV, V)     | 4064 $\pm$ 128                    | 5152 $\pm$ 178                    | 3936                                                        | 4192                                                        | 4974                                                        | 5330                                                        | <b>363</b>                          | 261                                     | 465                                    | $\pm$ 102                                          |
| 4000-7000                                      | 6 (III-VIII)          | 4064 $\pm$ 128                    | 6665 $\pm$ 110                    | 3936                                                        | 4192                                                        | 6555                                                        | 6775                                                        | <b>434</b>                          | 394                                     | 474                                    | $\pm$ 40                                           |
| Shortest time<br>between tsunamis<br>4000-7000 | IV and V              | 4583 $\pm$ 196                    | 4764 $\pm$ 140                    | 4387                                                        | 4779                                                        | 4624                                                        | 4904                                                        | <b>181</b>                          | - <sup>§</sup>                          | 517                                    | +336                                               |
| Longest time<br>between tsunamis<br>4000-7000  | V and VI              | 5152 $\pm$ 178                    | 6197 $\pm$ 156                    | 4974                                                        | 5330                                                        | 6041                                                        | 6353                                                        | <b>1045</b>                         | 711                                     | 1379                                   | $\pm$ 334                                          |

Note: Minimum and maximum dates are reported as  $\mu \pm 2\sigma$  cal. yr B.P.

Minimum and maximum dates are from Table 1.

Minimum age above and below: Take the minimum age from Table 1 and add/subtract the  $2\sigma$  error.

Maximum age above and below take the maximum age from Table 1 and add/subtract the  $2\sigma$  error.

Mean recurrence interval = (maximum date value  $\mu$  – minimum date value  $\mu$ ) / number of tsunamis during that interval, (rounded to nearest year).

Shortest recurrence interval = (minimum age below – maximum age above) / number of tsunamis during that interval, (rounded to nearest year).

Longest recurrence interval = (maximum age below – minimum age above) / number of tsunamis during that interval, (rounded to nearest year).

Recurrence interval difference is the difference between the mean recurrence interval and the shortest and longest recurrence intervals. The mean recurrence interval – recurrence interval difference = shortest recurrence interval; mean recurrence interval + recurrence interval difference = longest recurrence interval.

\*Present or 0 is defined as A.D. 1950 because these ages are derived from radiocarbon dates.

<sup>†</sup>Most well-constrained tsunami interval based on AMS radiocarbon dating and stratigraphy.

<sup>§</sup>The shortest recurrence interval can not be calculated because the maximum age above is greater than the minimum age below.
